# Supplementary material for: Practical Synthesis of 6-Amino-1-hydroxy-2,1-benzoxaborolane: A Key Intermediate of DNDI-6148
Source: PubMed Central journal article supplement (PMC11036395; doi:10.1021/acs.oprd.4c00031), 2024-03-29
Supplement: op4c00031_si_001.pdf [file op4c00031_si_001.pdf]

# Practical synthesis of 6-amino-1-hydroxy-2,1-benzoxaborolane: a key intermediate of DNDI-6148

*Pankaj V. Khairnar<sup>1Δ</sup>, John M. Saathoff<sup>1Δ</sup>, Daniel W. Cook<sup>1</sup>, Samuel R. Hochstetler<sup>1</sup>, Urvish Pandya<sup>2</sup>, Stephen J. Robinson<sup>2</sup>, Vijay Satam<sup>2</sup>, Kai O. Donsbach<sup>1</sup>, B. Frank Gupton<sup>1</sup>, Li-Mei Jin<sup>1\*</sup>, Charles S. Shanahan<sup>1\*</sup>*

<sup>1</sup>Medicines for All Institute, Virginia Commonwealth University, Richmond, VA, 23284-3068.

<sup>2</sup>Drugs for Neglected Diseases initiative, 15 Chemin Camille-Vidart, 1202 Geneva, Switzerland.

<sup>Δ</sup>These authors contributed equally.

\*Corresponding author. Email: jinl3@vcu.edu; shanahanc@vcu.edu

## GENERAL METHODS

Reagents and solvents were obtained from commercial suppliers and used as received unless otherwise indicated. Reactions were carried out in oven-dried (120 °C) glassware, that was assembled while hot, and cooled to ambient temperature under an inert atmosphere. All reactions were carried out under inert atmosphere (N<sub>2</sub>) unless otherwise noted. Reactions were monitored by TLC (precoated silica gel 60 F254 plates, EMD Chemicals), HPLC or LC/MS using various methods. TLC was visualized with UV light or by treatment with Phosphomolybdic acid (PMA), ninhydrin, and/or KMnO<sub>4</sub>. Flash chromatography was performed on a Teledyne ISCO Combi-Flash NEXTGEN 300+ and/or a Biotage Isolera using solvents as indicated. HRMS was recorded using Perkin Elmer Axion 2 ToF MS, ionization mode: positive with scan range: 100 - 1000 m/z, flight tube voltage: 8 kV, spray voltage: 3.5 kV, solvent: methanol. <sup>1</sup>H-NMR and <sup>13</sup>C-NMR spectra were routinely recorded on Bruker Avance III HD Ascend 600 MHz spectrometer. The NMR solvents used were CDCl<sub>3</sub>, CD<sub>3</sub>OD or DMSO-d<sub>6</sub> as indicated. Tetramethylsilane (TMS) was used as an internal standard. Coupling constants *J* are reported in hertz (Hz). The following abbreviations were used to designate signal multiplicity: s, singlet; d, doublet; t, triplet; q, quartet; p, pentet; dd, doublet of doublets; ddd, doublet of doublet of doublets; dt, double of triplets; ddt, doublet of doublet of triplets; m, multiplet; br, broad. 1,3,5-trimethoxybenzene and/or triphenylmethane, were used as internal standards for quantitative <sup>1</sup>H-NMR.

## HPLC/LCMS Method

LC with UV detection was used for the analysis of reaction mixtures and isolated product and intermediates. An Agilent 1100 series LC equipped with a diode array detector was used with the parameters shown below.

|                           |                                                      |
|---------------------------|------------------------------------------------------|
| <b>Column</b>             | Phenomenex Kinetex Phenyl Hexyl (150 x 4.6 mm; 5 μm) |
| <b>Flow Rate</b>          | 2.0 mL/min                                           |
| <b>Column Temperature</b> | 40 °C                                                |
| <b>Injection Volume</b>   | 1 μL                                                 |
| <b>Mobile Phase A</b>     | 0.1% H <sub>3</sub> PO <sub>4</sub> in water*        |
| <b>Mobile Phase B</b>     | Methanol                                             |

| Gradient Table         | Time (min) | %A  | %B  |
|------------------------|------------|-----|-----|
|                        | 0.0        | 80% | 20% |
|                        | 9.0        | 25% | 75% |
|                        | 12.0       | 25% | 75% |
| Post-Run Equilibration | 2 min      |     |     |
| Detection Wavelength   | 210 nm     |     |     |

Table S1. Synthesis of amide 5 by hydrolysis of nitrile 4.

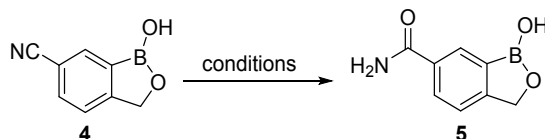

| Entry       | Conditions                                  | Isolated yield of 5        |
|-------------|---------------------------------------------|----------------------------|
| 1 (4: 1 g)  | NaOH, iPrOH, 90 °C, 16h                     | ~18 A%                     |
| 2 (4: 1 g)  | LiOH, iPrOH, 90 °C, 16h                     | NR                         |
| 3 (4: 1 g)  | KOH, iPrOH, 90 °C, 16h                      | ~60 A% (failed to isolate) |
| 4 (4: 1 g)  | H <sub>2</sub> SO <sub>4</sub> , 90 °C, 1h  | 49%                        |
| 5 (4: 10 g) | H <sub>2</sub> SO <sub>4</sub> , 90 °C, 1h  | 53%                        |
| 6 (4: 1 g)  | MsOH, 90 °C, 16h                            | 72%                        |
| 7 (4: 10 g) | MsOH, 90 °C, 16h                            | 78%                        |
| 8 (4: 1 g)  | TFA, 90 °C, 16h                             | 31%                        |
| 9 (4: 1 g)  | TfOH, 90 °C, 16h                            | 5% <sup>a</sup>            |
| 10 (4: 1 g) | H <sub>2</sub> SO <sub>4</sub> , 90 °C, 16h | 0 <sup>a</sup>             |
| 11 (4: 1 g) | HCl, 90 °C, 16h                             | 12 <sup>b</sup>            |
| 11 (4: 1 g) | NaHSO <sub>4</sub> , 90 °C, 16h             | NR                         |
| 11 (4: 1 g) | NaHSO <sub>3</sub> , 90 °C, 16h             | NR                         |

<sup>a</sup>SM was consumed. Decomposition occurred. <sup>b</sup>76 A% carboxylic acid was formed.

Table S2. Condition screening for the borylation of 2-bromo-1-methyl-4-nitrobenzene (8).

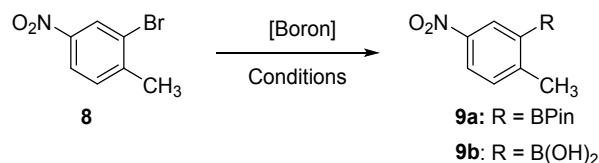

| Entry <sup>a</sup> | [Boron]                               | Conditions                                                            | Solvent     | Temp /°C | A% <sup>b</sup> |
|--------------------|---------------------------------------|-----------------------------------------------------------------------|-------------|----------|-----------------|
| 1                  | B(OMe) <sub>3</sub>                   | iPrMgCl-LiCl                                                          | THF         | -78      | ND              |
| 2                  | B(OiPr) <sub>3</sub>                  | iPrMgCl-LiCl                                                          | THF         | -78      | ND              |
| 3                  | B(OiPr) <sub>3</sub>                  | n-BuLi                                                                | THF         | -78      | ND              |
| 4                  | iPrO-BPin                             | n-BuLi                                                                | THF         | -78      | ND              |
| 5                  | BH <sub>3</sub> -NH(iPr) <sub>2</sub> | Mg, PhLi                                                              | THF         | 70       | ND              |
| 6                  | B(OiPr) <sub>3</sub>                  | Mg                                                                    | THF         | -78      | NR              |
| 7                  | B <sub>2</sub> Pin <sub>2</sub>       | 5 mol% Pd(PPh <sub>3</sub> )Cl <sub>2</sub> , PPh <sub>3</sub> , KOAc | 1,4-Dioxane | 100      | 20              |
| 8                  | B <sub>2</sub> Pin <sub>2</sub>       | 5 mol% Pd(OAc) <sub>2</sub> , PPh <sub>3</sub> , KOAc                 | 1,4-Dioxane | 100      | ND              |
| 9                  | B <sub>2</sub> Pin <sub>2</sub>       | 5 mol% Pd(OAc) <sub>2</sub> , Xphos, KOAc                             | EtOH        | 80       | 10              |
| 10                 | B <sub>2</sub> Pin <sub>2</sub>       | 5 mol% Pd(dppf)Cl <sub>2</sub> , KOAc                                 | 1,4-Dioxane | 100      | >90             |
| 11                 | B <sub>2</sub> Pin <sub>2</sub>       | 1% Pd(dppf)Cl <sub>2</sub> , KOAc                                     | 1,4-Dioxane | 100      | ~30             |
| 12                 | B <sub>2</sub> Pin <sub>2</sub>       | 1% Pd(OAc) <sub>2</sub> , dppf, KOAc                                  | 1,4-Dioxane | 100      | ~56             |
| 13                 | B <sub>2</sub> Pin <sub>2</sub>       | 0.1% Pd(dppf)Cl <sub>2</sub> , KOAc                                   | 1,4-Dioxane | 100      | ~7              |
| 14                 | B <sub>2</sub> Pin <sub>2</sub>       | 10 mol% Pd(OAc) <sub>2</sub>                                          | 1,4-Dioxane | 100      | ND              |
| 15                 | B <sub>2</sub> Pin <sub>2</sub>       | 10 mol% PdCl <sub>2</sub>                                             | 1,4-Dioxane | 100      | ND              |
| 16                 | B <sub>2</sub> Pin <sub>2</sub>       | 10 mol% Pd/C                                                          | 1,4-Dioxane | 100      | ND              |
| 17                 | B <sub>2</sub> (OH) <sub>4</sub>      | 5 mol% Pd(PPh <sub>3</sub> )Cl <sub>2</sub> , PPh <sub>3</sub> , KOAc | EtOH        | 80       | ND              |
| 18                 | B <sub>2</sub> (OH) <sub>4</sub>      | 5 mol% Pd(OAc) <sub>2</sub> , Xphos, KOAc                             | EtOH        | 80       | 20              |
| 19                 | B <sub>2</sub> (OH) <sub>4</sub>      | 5 mol% Pd(dppf)Cl <sub>2</sub> , KOAc                                 | EtOH        | 80       | ND              |
| 20                 | B <sub>2</sub> (OH) <sub>4</sub>      | 5 mol% Xphos-Pd-G2, KOAc                                              | EtOH        | 80       | ND              |

<sup>a</sup>Reaction conditions: For metal-halo exchange borylation: organometal (1.5 eq) and/or Mg (2 eq), 2-bromo-1-methyl-4-nitrobenzene (1.0 eq.), [Boron] (2 eq.), Solvent (10V); For Pd-borylation: Pd-Catalyst (X mol%), 2-bromo-1-methyl-4-nitrobenzene (1.0 eq.), [Boron] (1.1 eq.), potassium acetate (2.0 eq.), Solvent (10V). <sup>b</sup>Yields were calculated using HPLC A% at 210 nm.

**Setup for synthesis of 3-bromo-4-(hydroxymethyl)benzonitrile (3) from 3-bromo-4-methylbenzonitrile (2)**

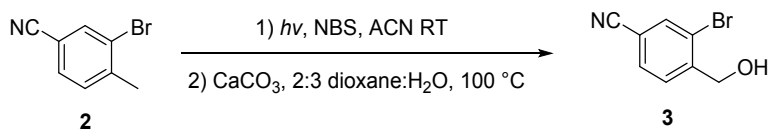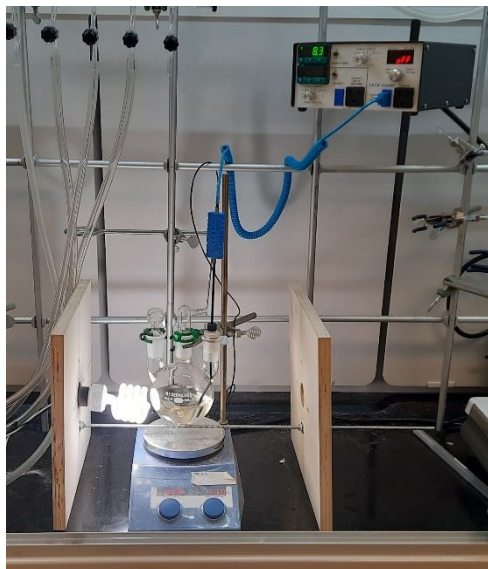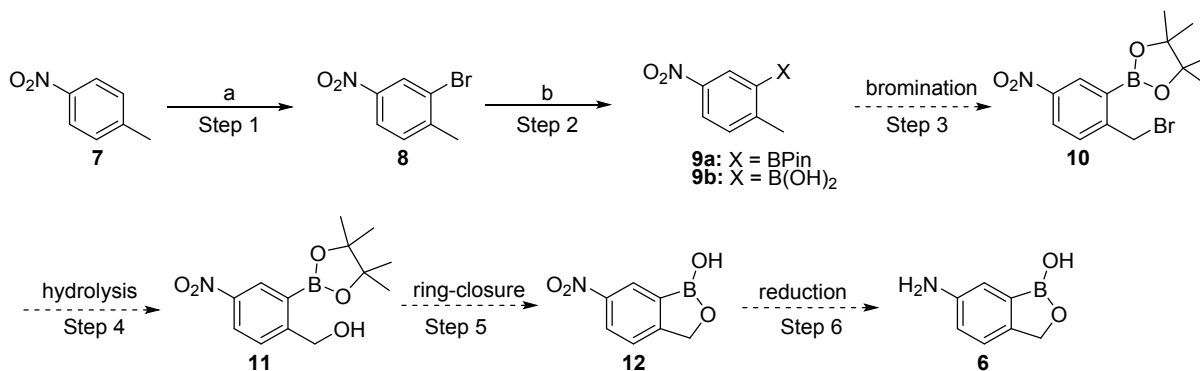

*Reagents and conditions:* (a) NBS, H<sub>2</sub>SO<sub>4</sub>, rt, 92%; (b) B<sub>2</sub>Pin<sub>2</sub>, 5 mol% Pd(dppf)Cl<sub>2</sub>, KOAc, toluene, 100 °C, 90%.

### Synthesis of 2-Bromo-4-nitrotoluene (**8**)<sup>1</sup>

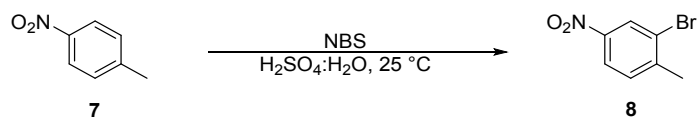

To a round bottom flask equipped with a magnetic stir bar, a mixture of p-nitrotoluene **7** (10.0 g, 1.0 eq. 72.9 mmol) and aqueous sulfuric acid (80 mL, 1:1 ratio by volume of conc. H<sub>2</sub>SO<sub>4</sub> and water) were added. The flask was wrapped with aluminum foil so that darkness might prevent competitive radical reactions. The mixture was stirred for 10 minutes, then N-bromosuccinimide (15.5 g, 1.2 eq. 87.5 mmol)

was added slowly (portion wise, over 20 minutes). The mixture was stirred at room temperature for 24 h. After completion (monitored by HPLC), the product was extracted by EtOAc (50 mL x 3). The combined organic phase was washed with brine and dried over anhydrous sodium sulfate. Solvent was removed to afford 2-Bromo-4-nitrotoluene **8** (14.42 g, 92% yield) as a yellow solid.

<sup>1</sup>H NMR (600 MHz, CDCl<sub>3</sub>) δ/ppm: 8.37 (s, 1H), 8.05 (d, *J* = 7.8 Hz, 1H), 7.39 (d, *J* = 8.2 Hz, 1H), 2.49 (s, 3H).

<sup>13</sup>C NMR (150 MHz, CDCl<sub>3</sub>) δ/ppm: 146.7, 146.0, 131.2, 127.5, 125.1, 122.3, 23.4.

**Melting Point** 74-76 °C.

#### Synthesis of 4,4,5,5-tetramethyl-2-(2-methyl-5-nitrophenyl)-1,3,2-dioxaborolane (**9a**):

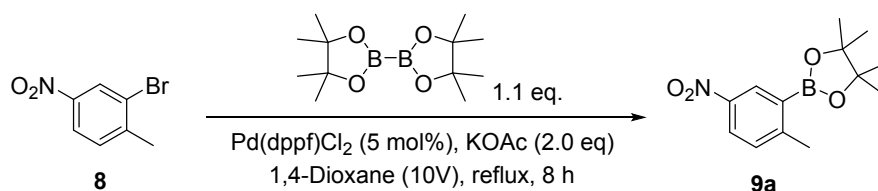

A mixture of Pd(dppf)Cl<sub>2</sub> (0.34 g, 5 mol%, 462.9 μmol), 2-bromo-1-methyl-4-nitrobenzene **8** (2.0 g, 1.0 eq, 9.2 mmol), bis(pinacolato)diboron (2.58 g, 1.1 eq, 10.2 mmol), and potassium acetate (1.82 g, 2.0 eq, 18.5 mmol) in 1,4-dioxane (20 mL) was degassed with N<sub>2</sub> at rt for 5 min, then the mixture was refluxed under nitrogen for 8 h. After completion (monitored by HPLC), the mixture was extracted with EtOAc (20 mL x 3). The organic layers were combined and washed sequentially with water and brine. The organic phase was separated and dried over anhydrous Na<sub>2</sub>SO<sub>4</sub>, and evaporated to dryness by rotary evaporation. The residue was stirred in hexanes (20 mL) for 30 min at rt, then the solid was collected by filtration and washed with hexanes (10 mL x 3) to afford a pure compound **9a**, 2.1 g, 86% yield.

<sup>1</sup>H NMR (600 MHz, CDCl<sub>3</sub>) δ/ppm: 8.59 (d, *J* = 2.6 Hz, 1H), 8.12 (dd, *J* = 8.4, 2.6 Hz, 1H), 7.29 (d, *J* = 8.4 Hz, 1H), 2.62 (s, 3H), 1.35 (s, 12H).

<sup>13</sup>C NMR (150 MHz, CDCl<sub>3</sub>) δ/ppm: 152.9, 145.8, 130.8, 125.5, 84.4, 25.0, 22.6.

**MS (m/z)** (M+H): calc. for C<sub>13</sub>H<sub>19</sub>BNO<sub>4</sub> 264, found 264.

**Melting Point** 89-92 °C.

**General procedure for the synthesis of diazonium salt (14) for DSC/TGA studies**

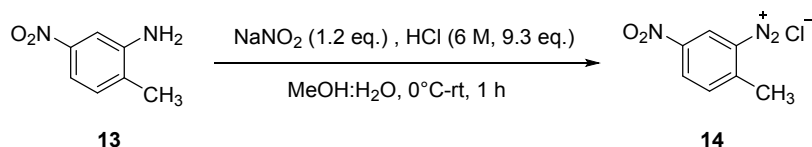

To an ice-cold solution of 2-methyl-5-nitroaniline **13** (1.0 g, 1.0 eq, 6.8 mmol) in methanol (20 mL) was added aq. HCl (10.2 mL, 6.0 M, 9.3 eq, 61.1 mmol). To this mixture was added a solution of sodium nitrite (0.59 g, 1.3 eq, 8.5 mmol) in water (10 mL) dropwise using addition funnel. The resulting mixture was stirred at 0 °C for 1h (Monitored by TLC, HPLC). After completion, the solid was collected by filtration and washed with methanol to get the pure diazonium salt as a brown solid **14** (1.29g, 98%).

**<sup>1</sup>H NMR** (600 MHz, CD<sub>3</sub>OD) δ/ppm: 9.64 (d, *J* = 2.3 Hz, 1H), 8.93 (dd, *J* = 8.7, 2.3 Hz, 1H), 8.15 (d, *J* = 8.7 Hz, 1H), 2.98 (s, 3H).

**<sup>13</sup>C NMR** (150 MHz, CD<sub>3</sub>OD) δ/ppm: 141.9, 138.1, 126.1, 125.9, 119.4, 109.3, 9.6.

**HRMS** (ESI) *m/z*: [M]<sup>+</sup> Calcd for C<sub>7</sub>H<sub>6</sub>N<sub>3</sub>O<sub>2</sub><sup>+</sup> 164.0455; Found 164.0456.

**Melting Point** 94-96 °C.

## DSC and TGA studies of Diazonium salt 14:

Instrument: TA SDT 650

Sample holder: TA Alumina 90  $\mu$ L sample cup

Scan temperature range: 30  $^{\circ}$ C to 250  $^{\circ}$ C

Scan rate: 10  $^{\circ}$ C/min

Purge: Nitrogen, 100 mL/min

For the DSC-TGA analysis, samples were analyzed as received in alumina 90  $\mu$ L sample cups. Approximately 5 mg of sample was added to the sample cup after tearing. The thermogram ran from 30-250  $^{\circ}$ C at a ramp of 10  $^{\circ}$ C/min.

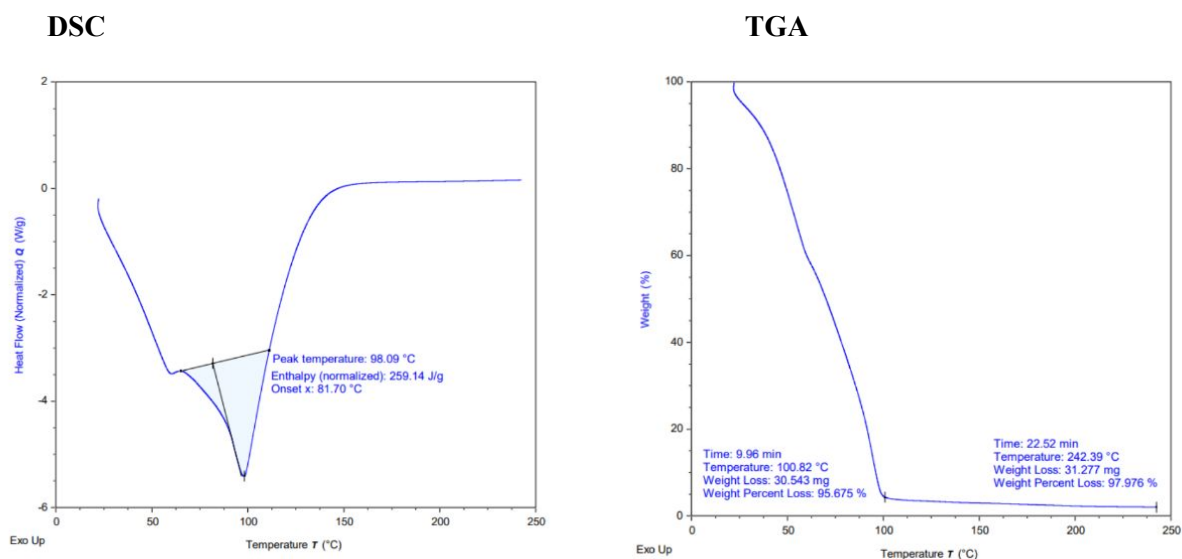

**Figure S1.** DSC (left) and TGA (right) results of the diazonium salt collected directly from a reaction mixture.

**DSC**

**TGA**

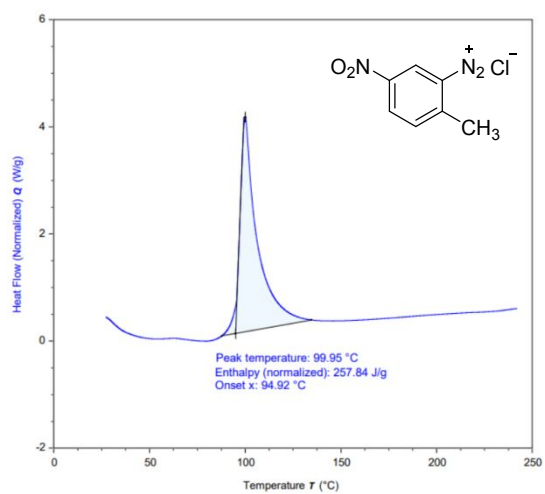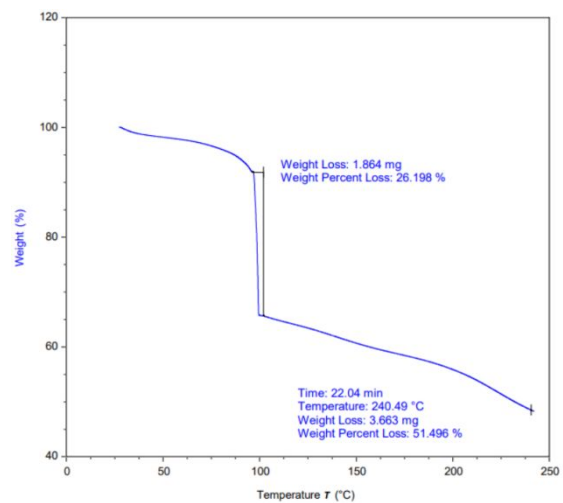

**Figure S2.** DSC (left) and TGA (right) results of the purified diazonium salt **14**.



**<sup>1</sup>H and <sup>13</sup>C NMR Spectra of all compounds**

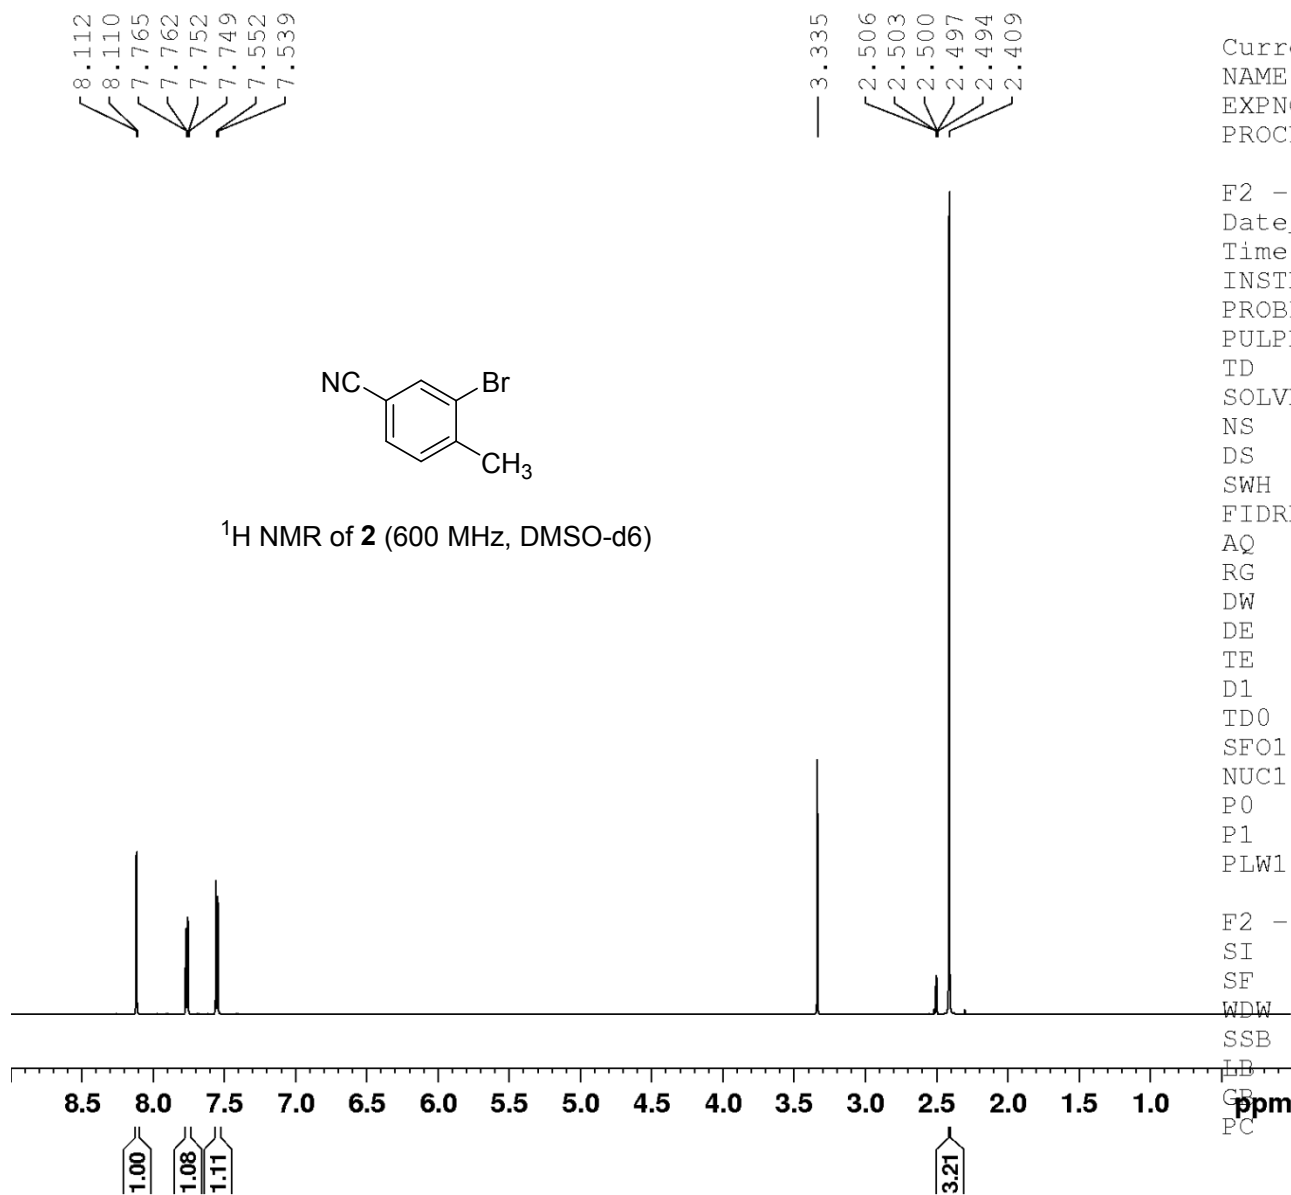

Current Data Parameters  
 NAME JMS56-X75 1H  
 EXPNO 1  
 PROCNO 1

F2 - Acquisition Parameters  
 Date\_ 20230111  
 Time 11.29 h  
 INSTRUM spect  
 PROBHD Z148658\_0003 (  
 PULPROG zg30  
 TD 65536  
 SOLVENT DMSO  
 NS 16  
 DS 2  
 SWH 12019.230 Hz  
 FIDRES 0.366798 Hz  
 AQ 2.7262976 sec  
 RG 135.67  
 DW 41.600 usec  
 DE 10.33 usec  
 TE 296.3 K  
 D1 1.00000000 sec  
 TD0 1  
 SFO1 600.0087050 MHz  
 NUC1 1H  
 P0 5.17 usec  
 P1 15.50 usec  
 PLW1 13.23200035 W

F2 - Processing parameters  
 SI 65536  
 SF 600.0050060 MHz  
 WDW EM  
 SSB 0  
 LB 0.30 Hz  
 GB 0  
 PC 1.00

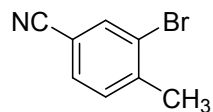

<sup>13</sup>C NMR of **2** (150 MHz, DMSO-d<sub>6</sub>)

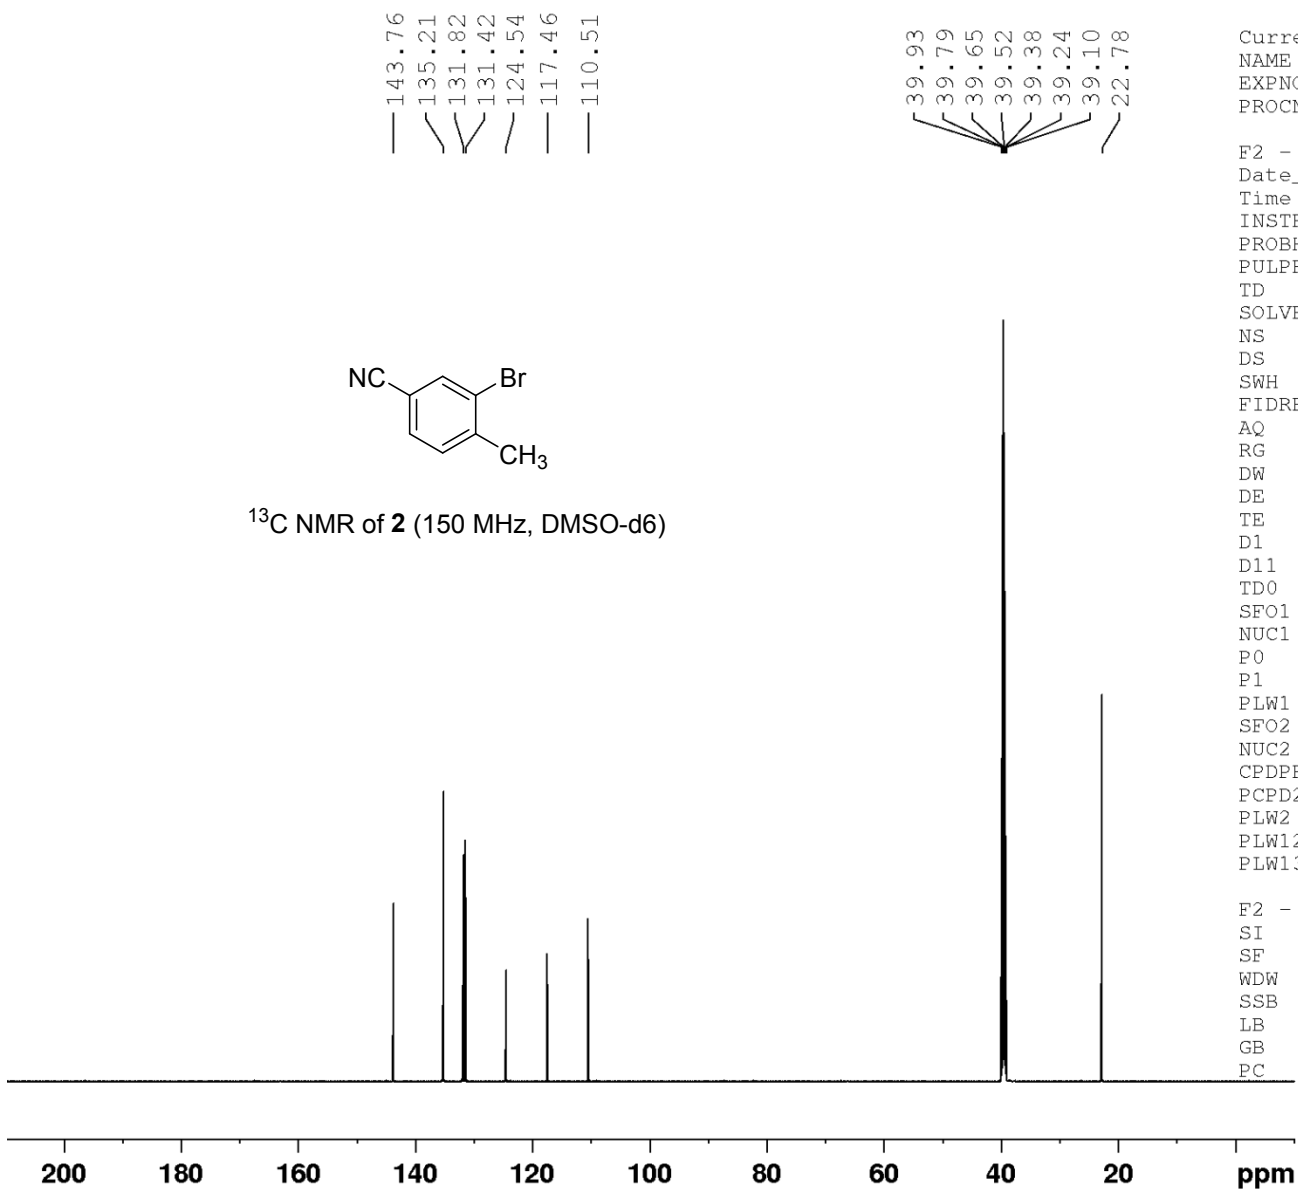

Current Data Parameters  
 NAME JMS56-X75 13C  
 EXPNO 1  
 PROCNO 1

F2 - Acquisition Parameters

Date\_ 20230112  
 Time 5.29 h  
 INSTRUM spect  
 PROBHD Z148658\_0003 (  
 PULPROG zgpg30  
 TD 65536  
 SOLVENT DMSO  
 NS 5000  
 DS 4  
 SWH 36231.883 Hz  
 FIDRES 1.105709 Hz  
 AQ 0.9043968 sec  
 RG 199.73  
 DW 13.800 usec  
 DE 6.50 usec  
 TE 298.1 K  
 D1 2.0000000 sec  
 D11 0.0300000 sec  
 TD0 1  
 SFO1 150.8864644 MHz  
 NUC1 13C  
 P0 4.00 usec  
 P1 12.00 usec  
 PLW1 77.65699768 W  
 SFO2 600.0074000 MHz  
 NUC2 1H  
 CPDPRG[2] waltz65  
 PCPD2 70.00 usec  
 PLW2 13.23200035 W  
 PLW12 0.64876997 W  
 PLW13 0.32633001 W

F2 - Processing parameters

SI 32768  
 SF 150.8714518 MHz  
 WDW EM  
 SSB 0  
 LB 1.00 Hz  
 GB 0  
 PC 1.40

8.118  
8.115  
7.888  
7.885  
7.874  
7.872  
7.702  
7.689

5.706

4.548

3.348

2.506  
2.503  
2.500  
2.497  
2.494

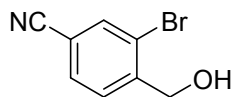

<sup>1</sup>H NMR of **3** (600 MHz, DMSO-d<sub>6</sub>)

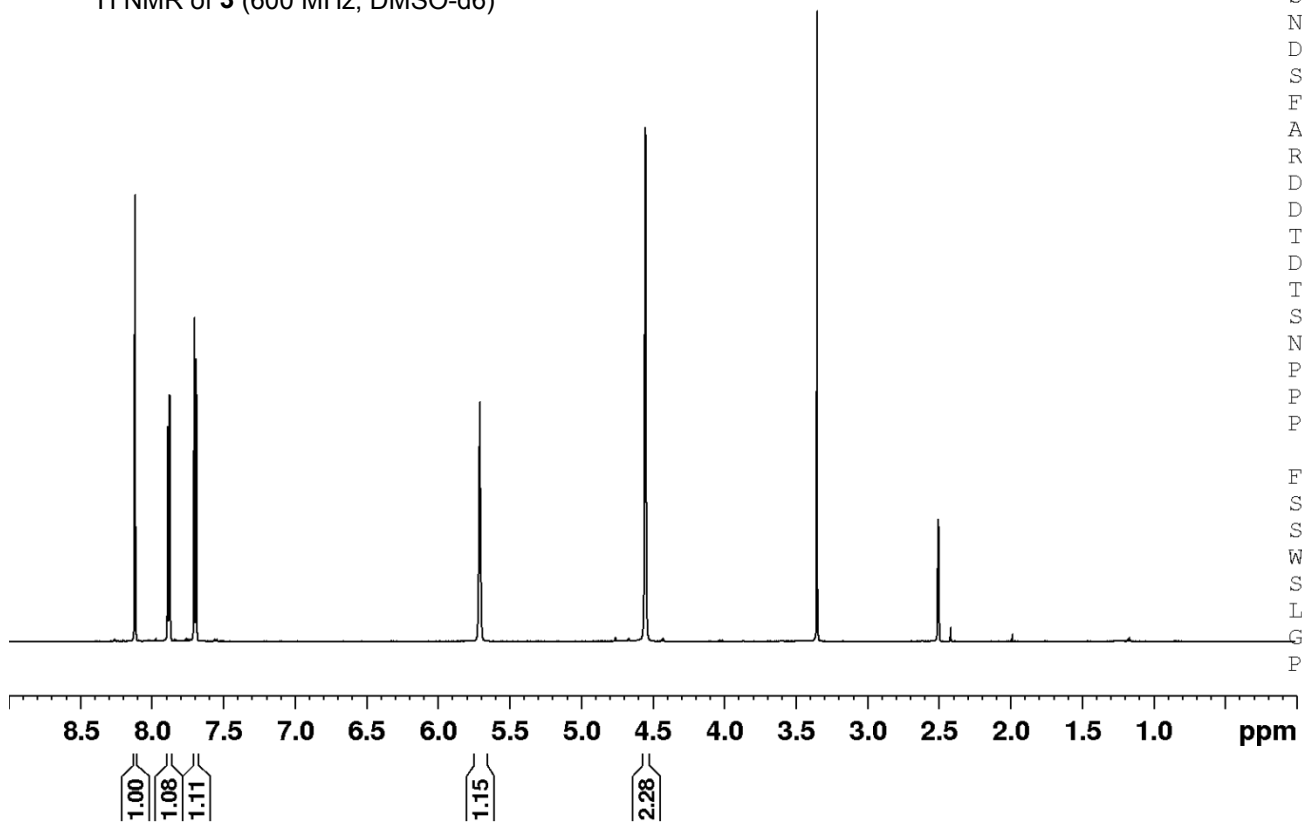

Current Data Parameters  
NAME JMS56-X77 1H  
EXPNO 1  
PROCNO 1

F2 - Acquisition Parameters  
Date\_ 20230125  
Time 11.22 h  
INSTRUM spect  
PROBHD Z148658\_0003 (  
PULPROG zg30  
TD 65536  
SOLVENT DMSO  
NS 16  
DS 2  
SWH 12019.230 Hz  
FIDRES 0.366798 Hz  
AQ 2.7262976 sec  
RG 135.67  
DW 41.600 usec  
DE 10.33 usec  
TE 296.4 K  
D1 1.00000000 sec  
TD0 1  
SFO1 600.0087050 MHz  
NUC1 1H  
P0 5.17 usec  
P1 15.50 usec  
PLW1 13.23200035 W

F2 - Processing parameters  
SI 65536  
SF 600.0050060 MHz  
WDW EM  
SSB 0  
LB 0.30 Hz  
GB 0  
PC 1.00

147.20  
135.08  
131.56  
128.28  
121.02  
117.57  
111.12

62.49  
39.93  
39.80  
39.66  
39.52  
39.38  
39.24  
39.10

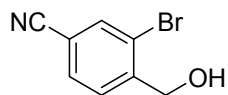

<sup>13</sup>C NMR of **3** (150 MHz, DMSO-d<sub>6</sub>)

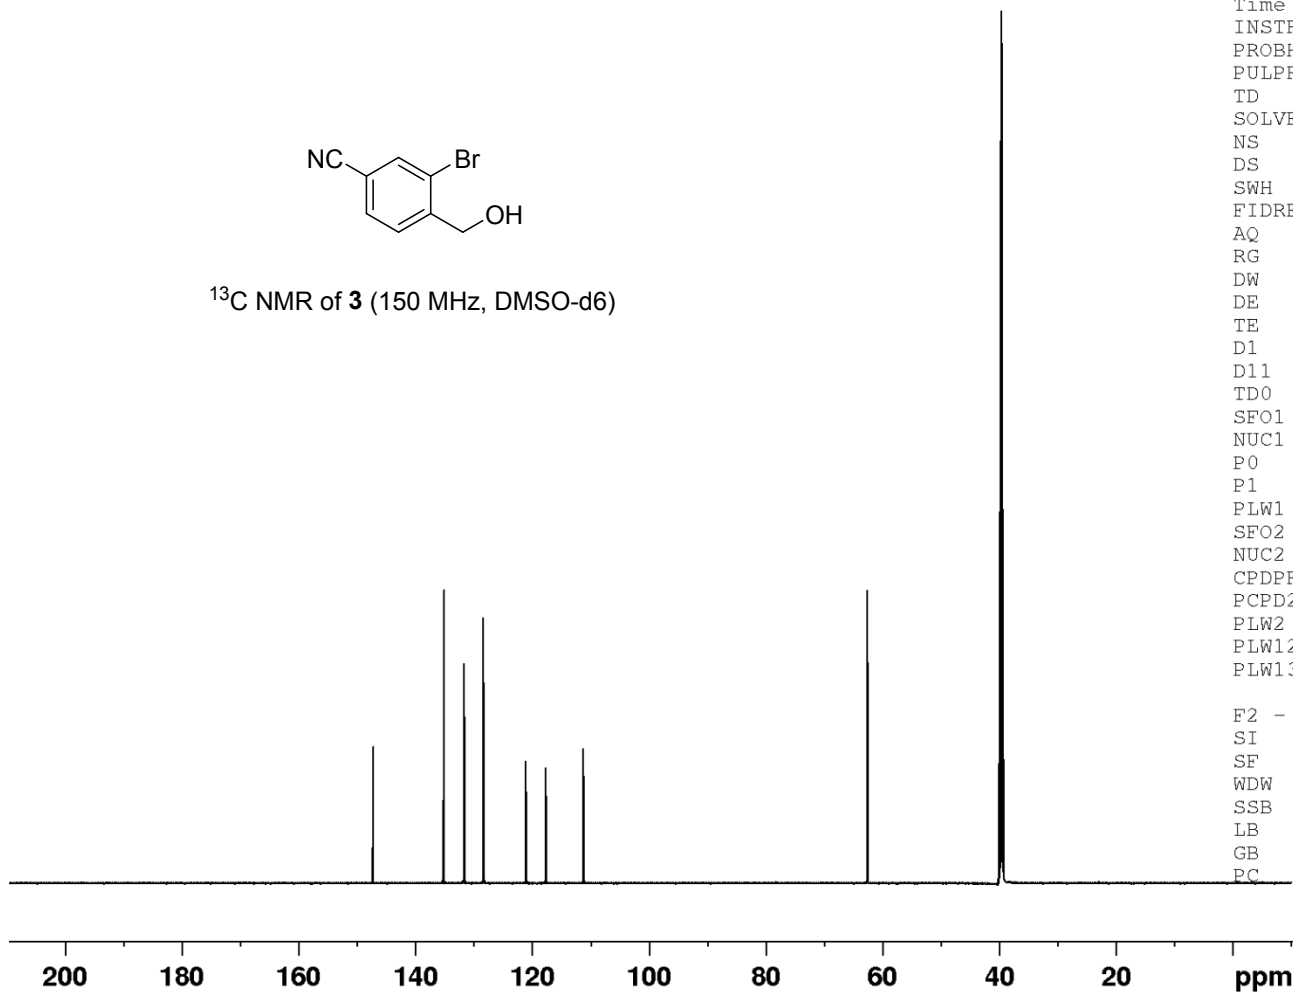

Current Data Parameters  
NAME JMS56-X77 13C  
EXPNO 1  
PROCNO 1

F2 - Acquisition Parameters

Date\_ 20230126  
Time 2.55 h  
INSTRUM spect  
PROBHD Z148658\_0003 (  
PULPROG zgpg30  
TD 65536  
SOLVENT DMSO  
NS 5000  
DS 4  
SWH 36231.883 Hz  
FIDRES 1.105709 Hz  
AQ 0.9043968 sec  
RG 199.73  
DW 13.800 usec  
DE 6.50 usec  
TE 297.6 K  
D1 2.00000000 sec  
D11 0.03000000 sec  
TD0 1  
SFO1 150.8864644 MHz  
NUC1 13C  
P0 4.00 usec  
P1 12.00 usec  
PLW1 77.65699768 W  
SFO2 600.0074000 MHz  
NUC2 1H  
CPDPRG[2] waltz65  
PCPD2 70.00 usec  
PLW2 13.23200035 W  
PLW12 0.64876997 W  
PLW13 0.32633001 W

F2 - Processing parameters

SI 32768  
SF 150.8714484 MHz  
WDW EM  
SSB 0  
LB 1.00 Hz  
GB 0  
PC 1.40

8.097  
7.917  
7.915  
7.904  
7.902  
7.644  
7.643  
7.631  
7.630

5.077

3.351

2.506  
2.503  
2.500  
2.497  
2.494

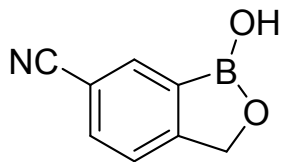

<sup>1</sup>H NMR of 4 (600 MHz, DMSO-d6)

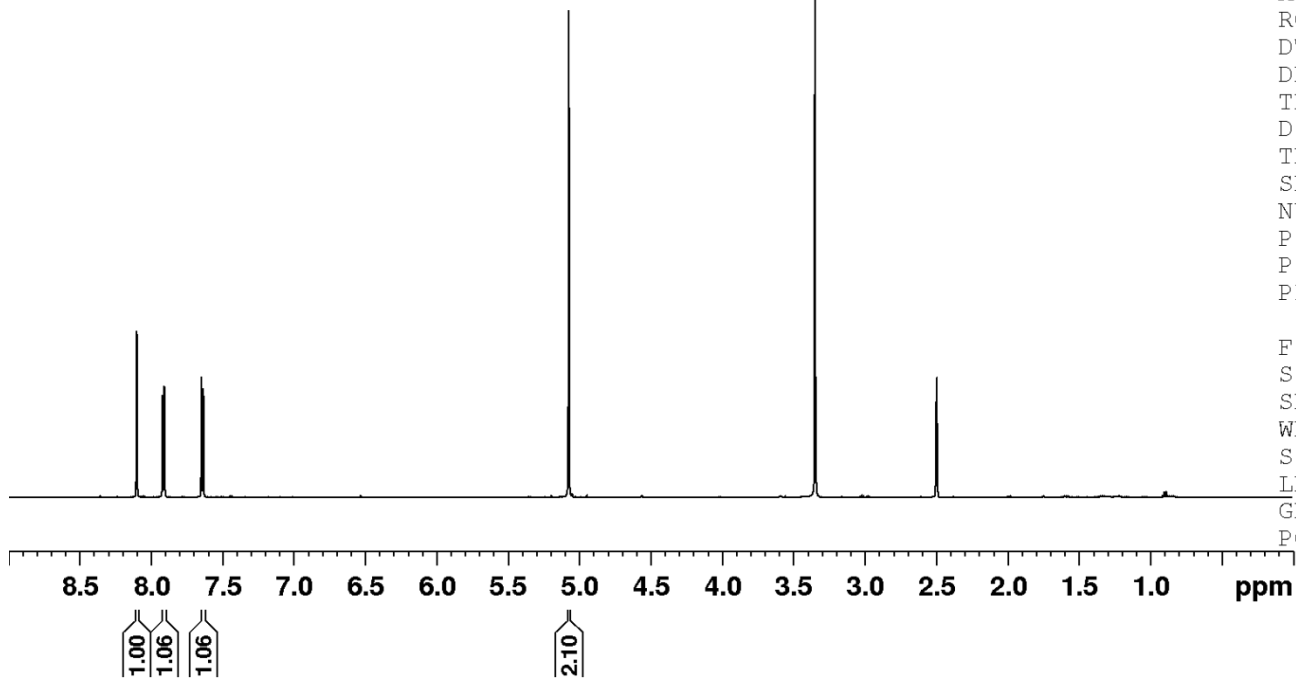

Current Data Parameters  
NAME JMS56-X80 1H  
EXPNO 1  
PROCNO 1

F2 - Acquisition Parameters  
Date\_ 20230206  
Time 10.16 h  
INSTRUM spect  
PROBHD Z148658\_0003 (  
PULPROG zg30  
TD 65536  
SOLVENT DMSO  
NS 16  
DS 2  
SWH 12019.230 Hz  
FIDRES 0.366798 Hz  
AQ 2.7262976 sec  
RG 199.73  
DW 41.600 usec  
DE 10.33 usec  
TE 296.4 K  
D1 1.00000000 sec  
TD0 1  
SFO1 600.0087050 MHz  
NUC1 1H  
P0 5.17 usec  
P1 15.50 usec  
PLW1 13.23200035 W

F2 - Processing parameters  
SI 65536  
SF 600.0050061 MHz  
WDW EM  
SSB 0  
LB 0.30 Hz  
GB 0  
PC 1.00

<sup>13</sup>C NMR of **4** (150 MHz, DMSO-d6)

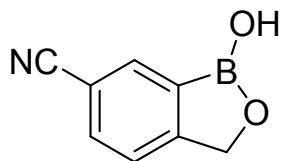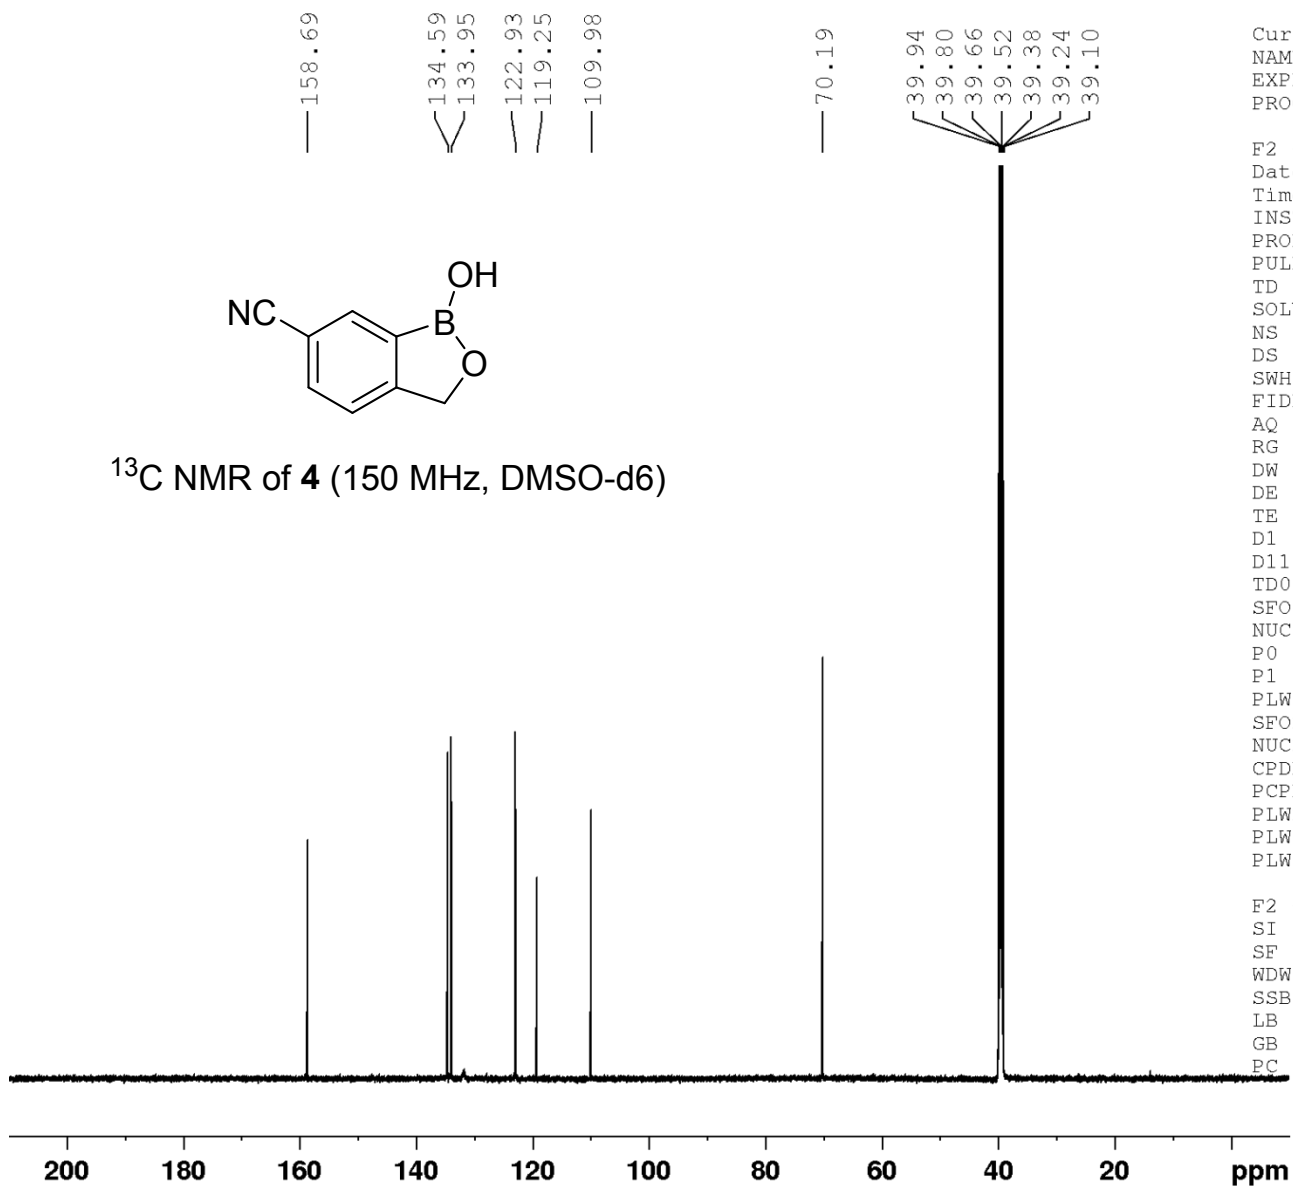

Current Data Parameters  
NAME JMS56-X80 13C  
EXPNO 1  
PROCNO 1

F2 - Acquisition Parameters  
Date\_ 20230207  
Time 1.44 h  
INSTRUM spect  
PROBHD Z148658\_0003 (  
PULPROG zgpg30  
TD 65536  
SOLVENT DMSO  
NS 5000  
DS 4  
SWH 36231.883 Hz  
FIDRES 1.105709 Hz  
AQ 0.9043968 sec  
RG 199.73  
DW 13.800 usec  
DE 6.50 usec  
TE 297.1 K  
D1 2.00000000 sec  
D11 0.03000000 sec  
TD0 1  
SFO1 150.8864644 MHz  
NUC1 13C  
P0 4.00 usec  
P1 12.00 usec  
PLW1 77.65699768 W  
SFO2 600.0074000 MHz  
NUC2 1H  
CPDPRG[2] waltz65  
PCPD2 70.00 usec  
PLW2 13.23200035 W  
PLW12 0.64876997 W  
PLW13 0.32633001 W

F2 - Processing parameters  
SI 32768  
SF 150.8714461 MHz  
WDW EM  
SSB 0  
LB 1.00 Hz  
GB 0  
PC 1.40

9.304  
8.239  
8.238  
7.982  
7.962  
7.959  
7.949  
7.946  
7.471  
7.471  
7.458  
7.457  
7.326

5.030

3.367  
2.506  
2.503  
2.500  
2.497  
2.494

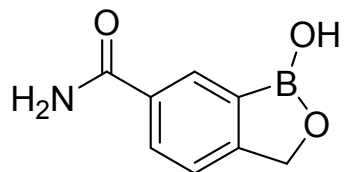

<sup>1</sup>H NMR of **5** (600 MHz, DMSO-d<sub>6</sub>)

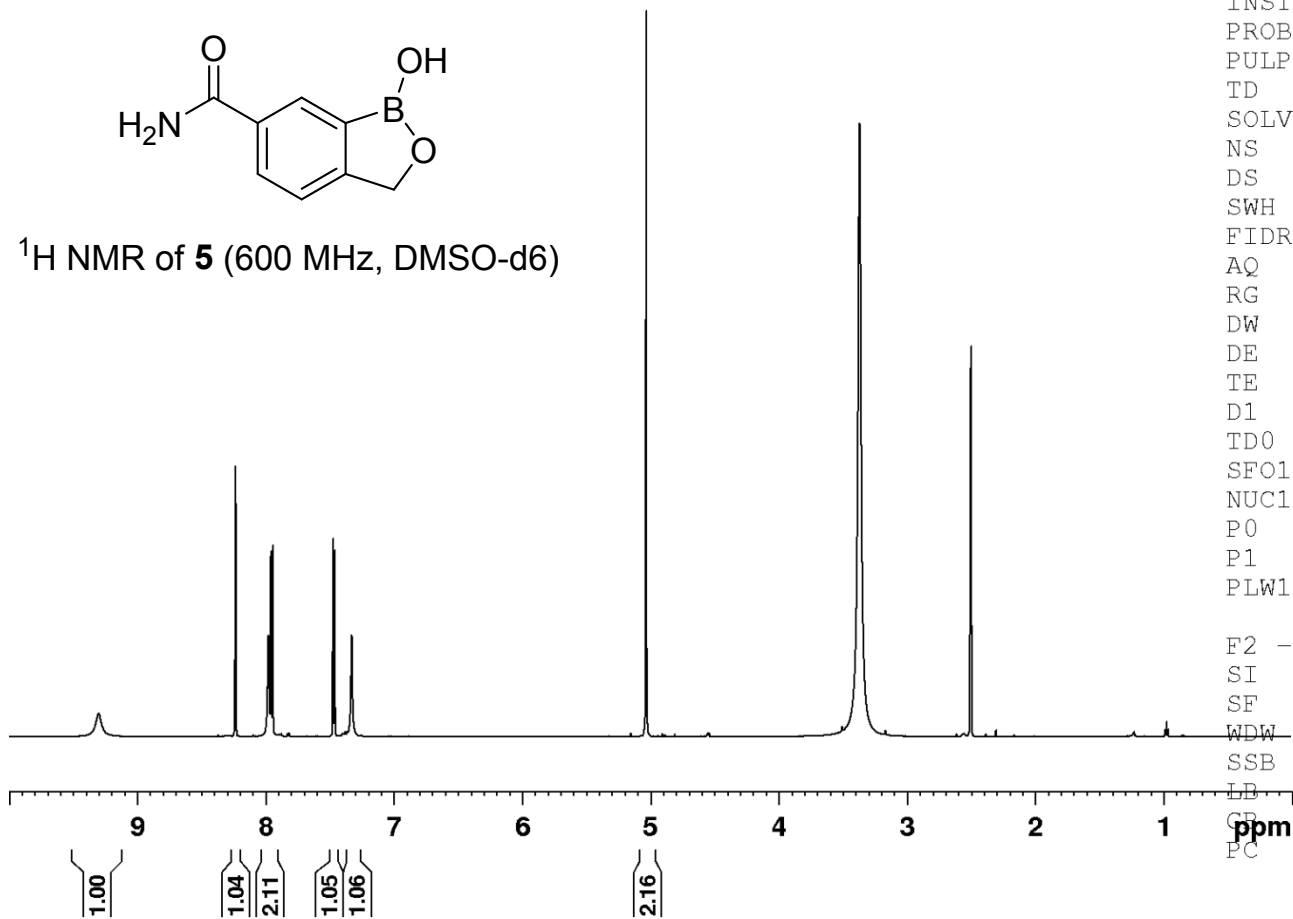

Current Data Parameters  
NAME JMS56-X81 1H  
EXPNO 3  
PROCNO 1

F2 - Acquisition Parameters

Date\_ 20230228  
Time 12.31 h  
INSTRUM spect  
PROBHD Z855801\_0105 (  
PULPROG zg30  
TD 65536  
SOLVENT DMSO  
NS 16  
DS 2  
SWH 12019.230 Hz  
FIDRES 0.366798 Hz  
AQ 2.7262976 sec  
RG 110.56  
DW 41.600 usec  
DE 10.93 usec  
TE 295.1 K  
D1 1.00000000 sec  
TD0 1  
SF01 599.9587047 MHz  
NUC1 1H  
P0 4.00 usec  
P1 12.00 usec  
PLW1 15.77700043 W

F2 - Processing parameters

SI 65536  
SF 599.9550063 MHz  
WDW EM  
SSB 0  
LB 0.30 Hz  
PC 1.00

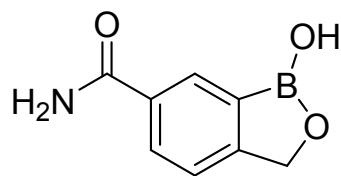

<sup>13</sup>C NMR of **5** (150 MHz, DMSO-d<sub>6</sub>)

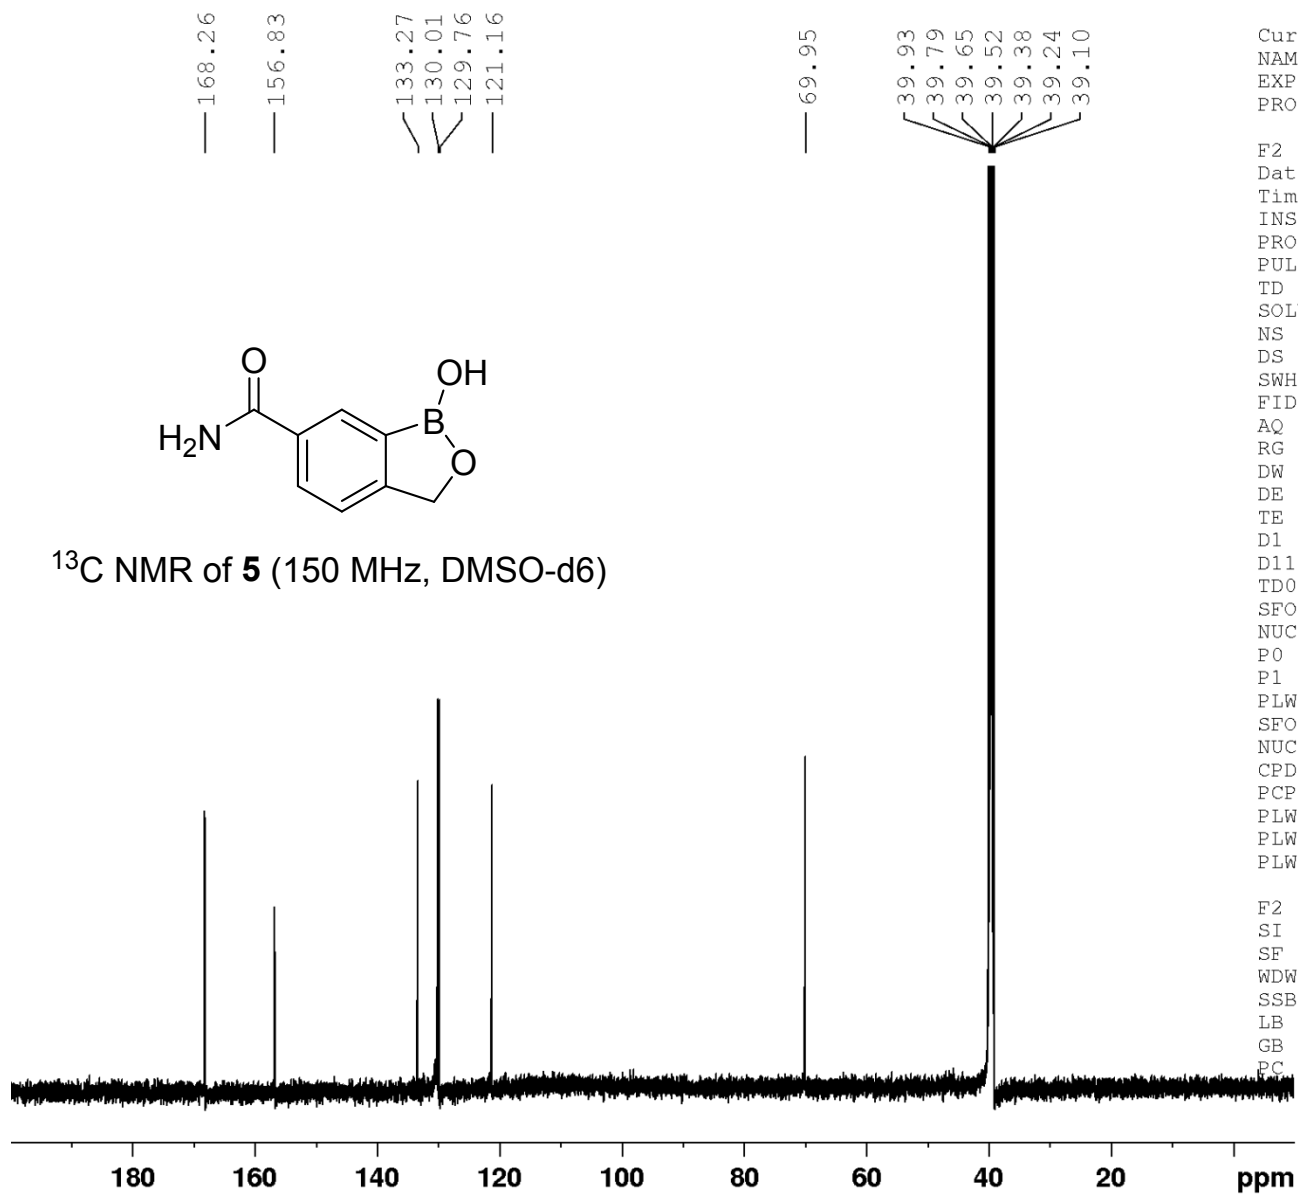

Current Data Parameters  
 NAME JMS56-X81 13C  
 EXPNO 2  
 PROCNO 1

F2 - Acquisition Parameters  
 Date\_ 20230302  
 Time 2.52 h  
 INSTRUM spect  
 PROBHD 2855801\_0105 (  
 PULPROG zgpg30  
 TD 65536  
 SOLVENT DMSO  
 NS 5000  
 DS 4  
 SWH 36231.883 Hz  
 FIDRES 1.105709 Hz  
 AQ 0.9043968 sec  
 RG 194.75  
 DW 13.800 usec  
 DE 6.50 usec  
 TE 296.6 K  
 D1 2.00000000 sec  
 D11 0.03000000 sec  
 TD0 1  
 SFO1 150.8738906 MHz  
 NUC1 13C  
 P0 3.67 usec  
 P1 11.00 usec  
 PLW1 178.30999756 W  
 SFO2 599.9573998 MHz  
 NUC2 1H  
 CPDPRG[2] waltz65  
 PCPD2 70.00 usec  
 PLW2 15.77700043 W  
 PLW12 0.46366000 W  
 PLW13 0.23322000 W

F2 - Processing parameters  
 SI 32768  
 SF 150.8588751 MHz  
 WDW EM  
 SSB 0  
 LB 1.00 Hz  
 GB 0  
 PC 1.40



— 8.909

7.038  
7.025  
6.887  
6.884  
6.712  
6.708  
6.698  
6.695

4.976  
4.812

— 3.354  
2.505  
2.503  
2.500  
2.497  
2.494

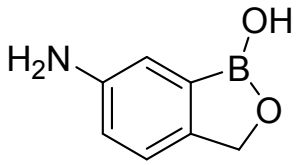

<sup>1</sup>H NMR of **6** (600 MHz, DMSO-d6)

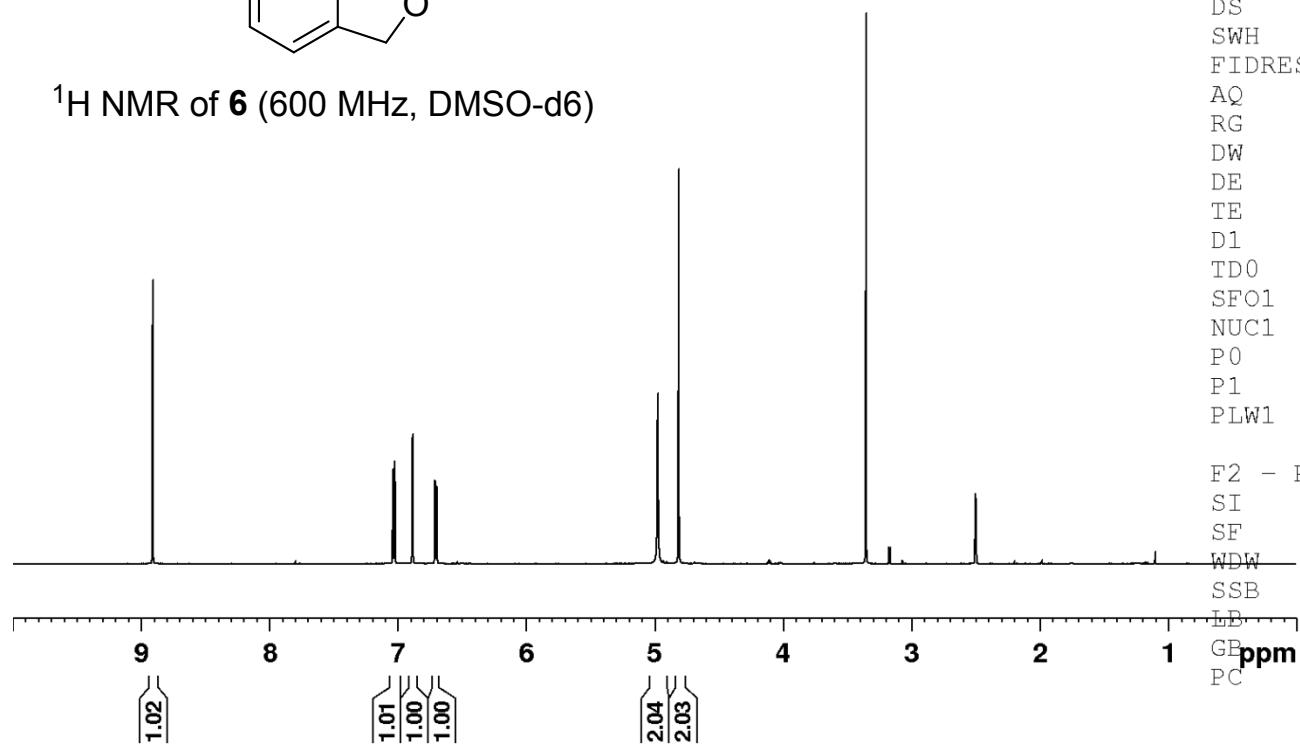

Current Data Parameters  
 NAME JMS56-X74 1H  
 EXPNO 1  
 PROCNO 1

F2 - Acquisition Parameters  
 Date\_ 20230221  
 Time 13.18 h  
 INSTRUM spect  
 PROBHD z148658\_0003 (  
 PULPROG zg30  
 TD 65536  
 SOLVENT DMSO  
 NS 16  
 DS 2  
 SWH 12019.230 Hz  
 FIDRES 0.366798 Hz  
 AQ 2.7262976 sec  
 RG 199.73  
 DW 41.600 usec  
 DE 10.33 usec  
 TE 296.2 K  
 D1 1.00000000 sec  
 TD0 1  
 SFO1 600.0087050 MHz  
 NUC1 1H  
 P0 5.17 usec  
 P1 15.50 usec  
 PLW1 13.23200035 W

F2 - Processing parameters  
 SI 65536  
 SF 600.0050061 MHz  
 WDW EM  
 SSB 0  
 LB 0.30 Hz  
 GB 0  
 PC 1.00

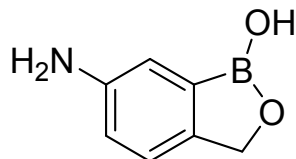

$^{13}\text{C}$  NMR of **6** (150 MHz, DMSO-d<sub>6</sub>)

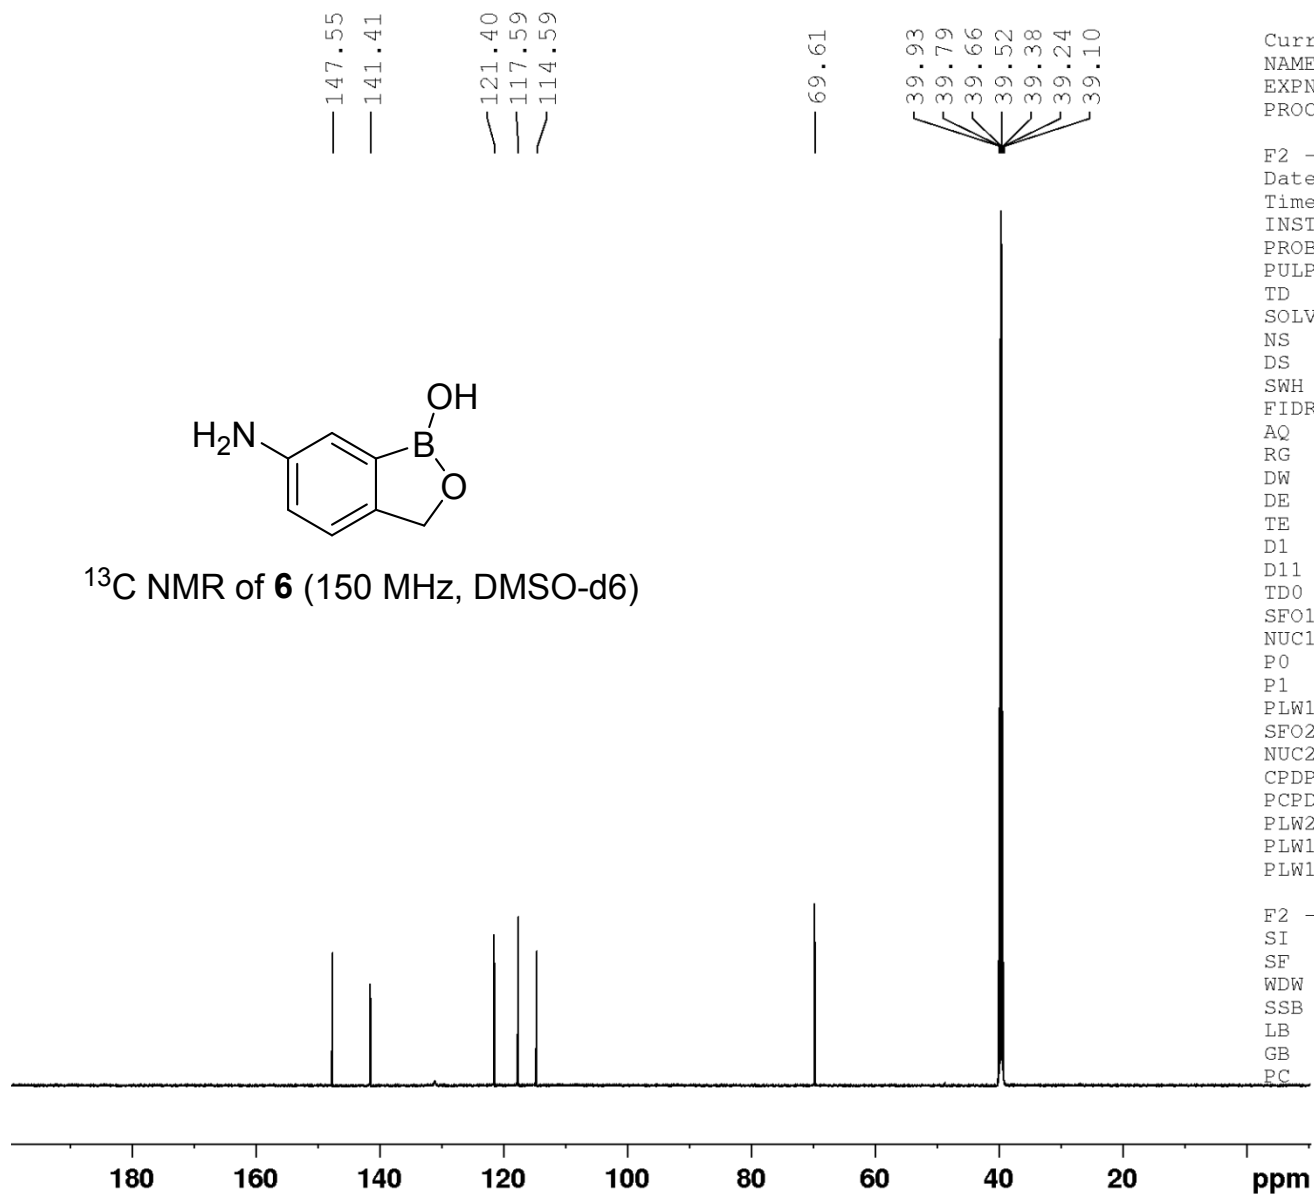

Current Data Parameters  
 NAME JMS56-X74 13C  
 EXPNO 4  
 PROCNO 1

F2 - Acquisition Parameters  
 Date\_ 20230302  
 Time 7.05 h  
 INSTRUM spect  
 PROBHD 2855801\_0105 (  
 PULPROG zgpg30  
 TD 65536  
 SOLVENT DMSO  
 NS 5000  
 DS 4  
 SWH 36231.883 Hz  
 FIDRES 1.105709 Hz  
 AQ 0.9043968 sec  
 RG 194.75  
 DW 13.800 usec  
 DE 6.50 usec  
 TE 296.9 K  
 D1 2.0000000 sec  
 D11 0.03000000 sec  
 TD0 1  
 SFO1 150.8738906 MHz  
 NUC1 13C  
 P0 3.67 usec  
 P1 11.00 usec  
 PLW1 178.30999756 W  
 SFO2 599.9573998 MHz  
 NUC2 1H  
 CPDPRG[2] waltz65  
 PCPD2 70.00 usec  
 PLW2 15.77700043 W  
 PLW12 0.46366000 W  
 PLW13 0.23322000 W

F2 - Processing parameters  
 SI 32768  
 SF 150.8588756 MHz  
 WDW EM  
 SSB 0  
 LB 1.00 Hz  
 GB 0  
 PC 1.40

8.375  
8.061  
8.048  
7.399  
7.385  
7.260

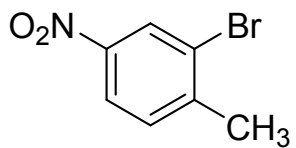

<sup>1</sup>H NMR of 8 (600 MHz, CDCl<sub>3</sub>)

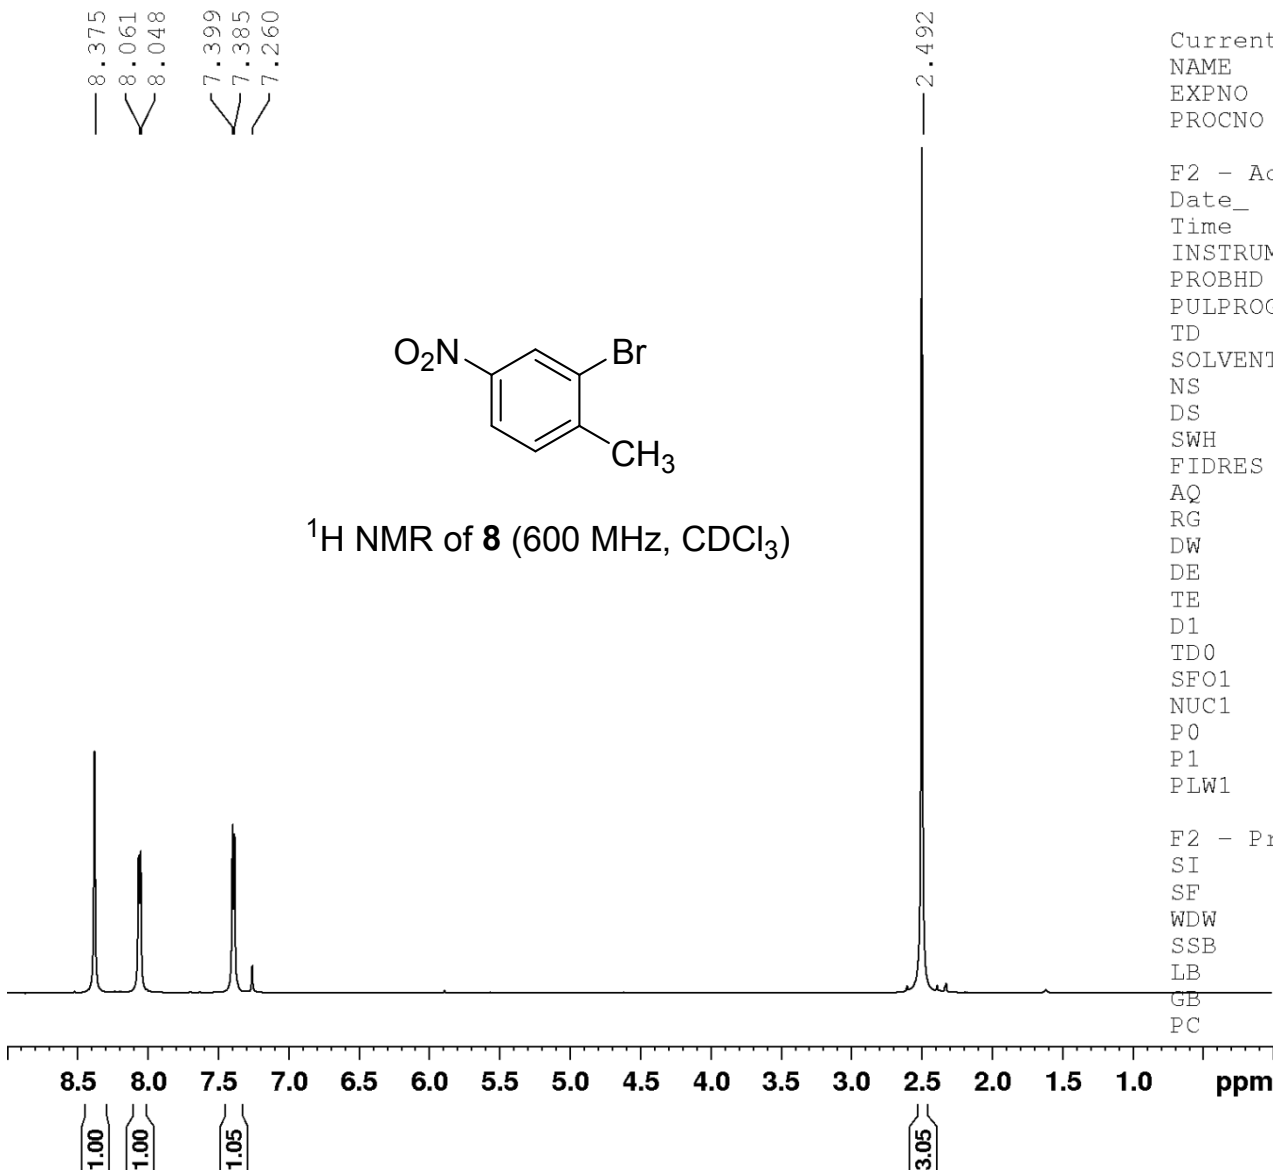

Current Data Parameters  
NAME PVK49-X8 Product Pure 2nd  
EXPNO 1  
PROCNO 1

F2 - Acquisition Parameters  
Date\_ 20230106  
Time 17.35 h  
INSTRUM spect  
PROBHD Z148658\_0003 (  
PULPROG zg30  
TD 65536  
SOLVENT CDCl3  
NS 16  
DS 2  
SWH 12019.230 Hz  
FIDRES 0.366798 Hz  
AQ 2.7262976 sec  
RG 89.69  
DW 41.600 usec  
DE 10.33 usec  
TE 296.8 K  
D1 1.00000000 sec  
TD0 1  
SFO1 600.0087050 MHz  
NUC1 1H  
P0 5.17 usec  
P1 15.50 usec  
PLW1 13.23200035 W

F2 - Processing parameters  
SI 65536  
SF 600.0050160 MHz  
WDW EM  
SSB 0  
LB 0.30 Hz  
GB 0  
PC 1.00

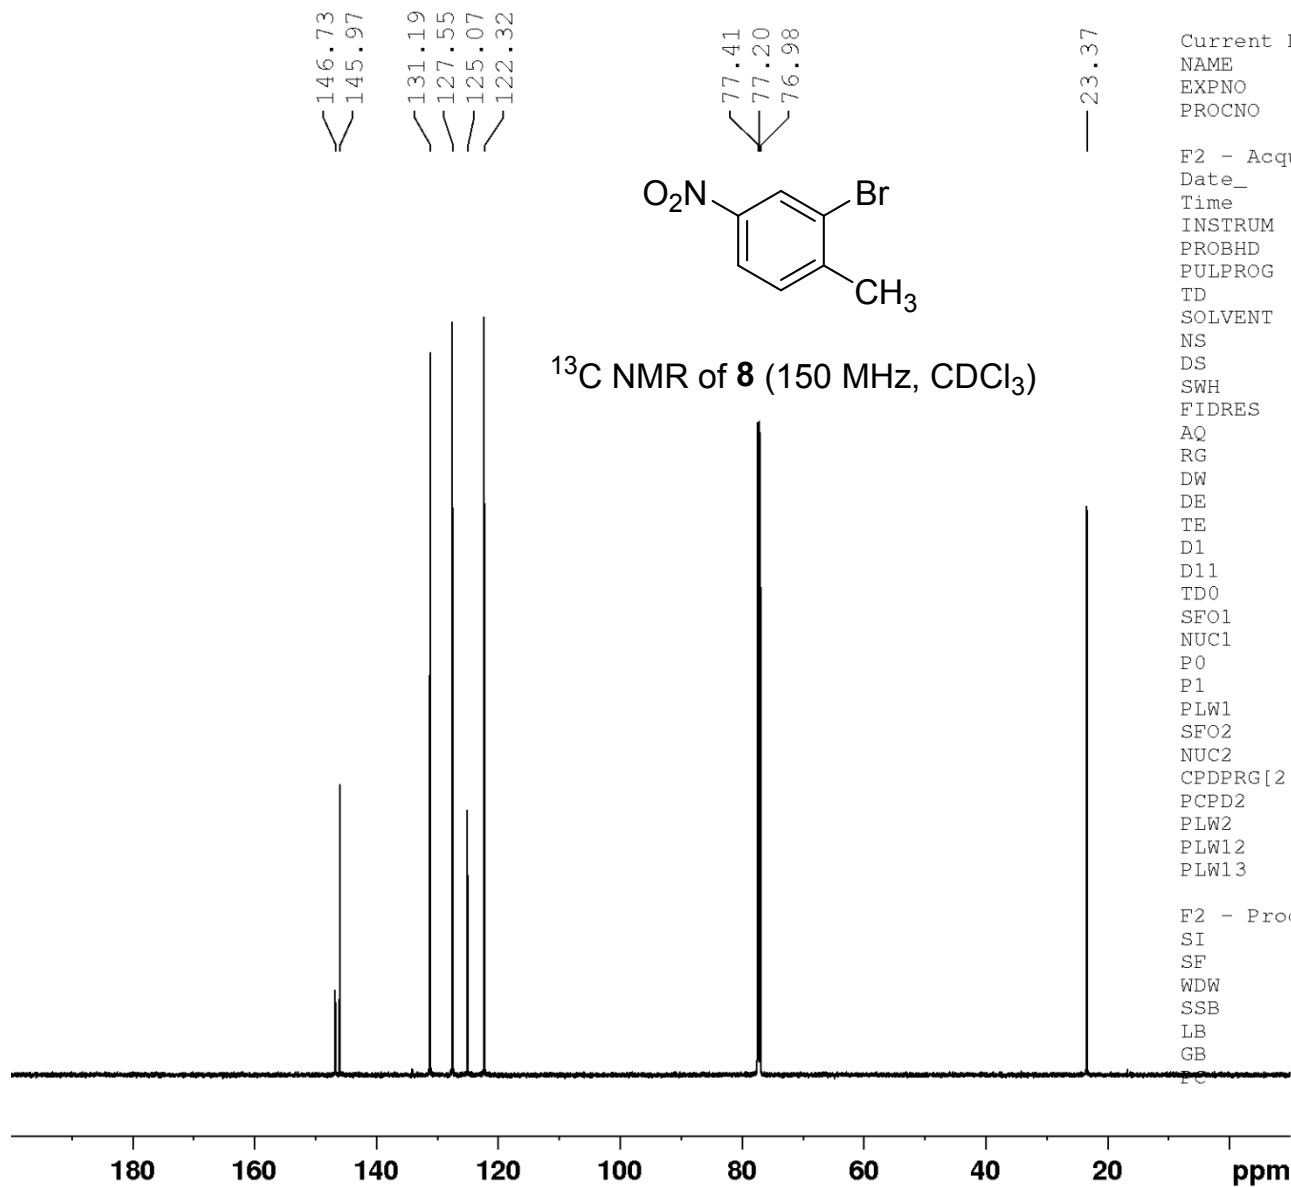

Current Data Parameters  
 NAME PVK49-X8 Product Pure 2nd  
 EXPNO 2  
 PROCNO 1

F2 - Acquisition Parameters  
 Date\_ 20230106  
 Time 18.27 h  
 INSTRUM spect  
 PROBHD Z148658\_0003 (  
 PULPROG zgpg30  
 TD 65536  
 SOLVENT CDCl3  
 NS 1024  
 DS 4  
 SWH 36231.883 Hz  
 FIDRES 1.105709 Hz  
 AQ 0.9043968 sec  
 RG 199.73  
 DW 13.800 usec  
 DE 6.50 usec  
 TE 298.2 K  
 D1 2.00000000 sec  
 D11 0.03000000 sec  
 TD0 1  
 SFO1 150.8864644 MHz  
 NUC1 13C  
 P0 4.00 usec  
 P1 12.00 usec  
 PLW1 77.65699768 W  
 SFO2 600.0074000 MHz  
 NUC2 1H  
 CPDPRG[2] waltz65  
 PCPD2 70.00 usec  
 PLW2 13.23200035 W  
 PLW12 0.64876997 W  
 PLW13 0.32633001 W

F2 - Processing parameters  
 SI 32768  
 SF 150.8713585 MHz  
 WDW EM  
 SSB 0  
 LB 1.00 Hz  
 GB 0  
 PC 1.40

8.592  
8.588  
8.135  
8.131  
8.121  
8.117  
7.301  
7.287  
7.260

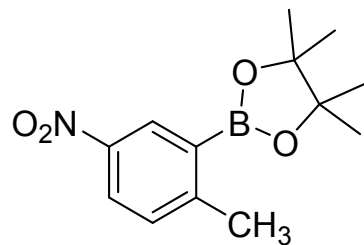

<sup>1</sup>H NMR of **9a** (600 MHz, CDCl<sub>3</sub>)

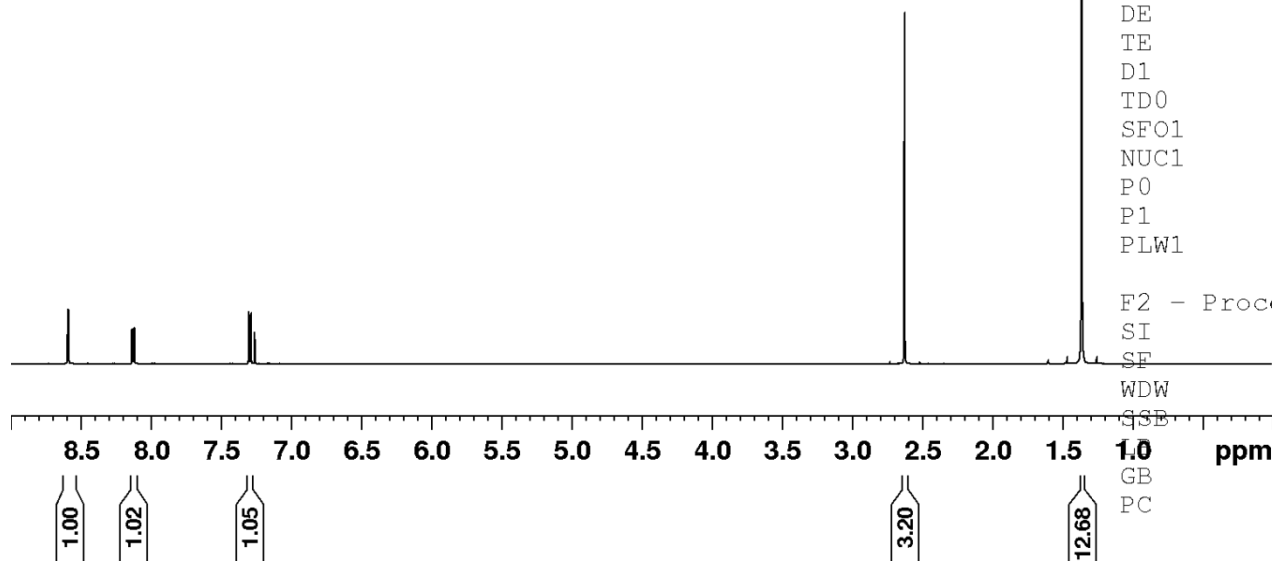

2.624

1.360

Current Data Parameters  
NAME PVK49-X42 A-3' Pure  
EXPNO 1  
PROCNO 1

F2 - Acquisition Parameters  
Date\_ 20230109  
Time 15.25 h  
INSTRUM spect  
PROBHD Z148658\_0003 (  
PULPROG zg30  
TD 65536  
SOLVENT CDCl3  
NS 16  
DS 2  
SWH 12019.230 Hz  
FIDRES 0.366798 Hz  
AQ 2.7262976 sec  
RG 78.64  
DW 41.600 usec  
DE 10.33 usec  
TE 296.3 K  
D1 1.00000000 sec  
TD0 1  
SFO1 600.0087050 MHz  
NUC1 1H  
P0 5.17 usec  
P1 15.50 usec  
PLW1 13.23200035 W

F2 - Processing parameters  
SI 65536  
SF 600.0050155 MHz  
WDW EM  
SSB 0  
GB 0  
PC 1.00

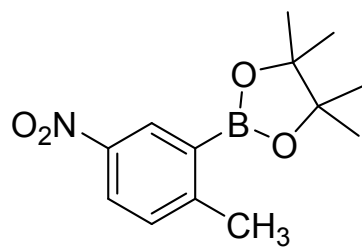

$^{13}\text{C}$  NMR of **9a** (150 MHz,  $\text{CDCl}_3$ )

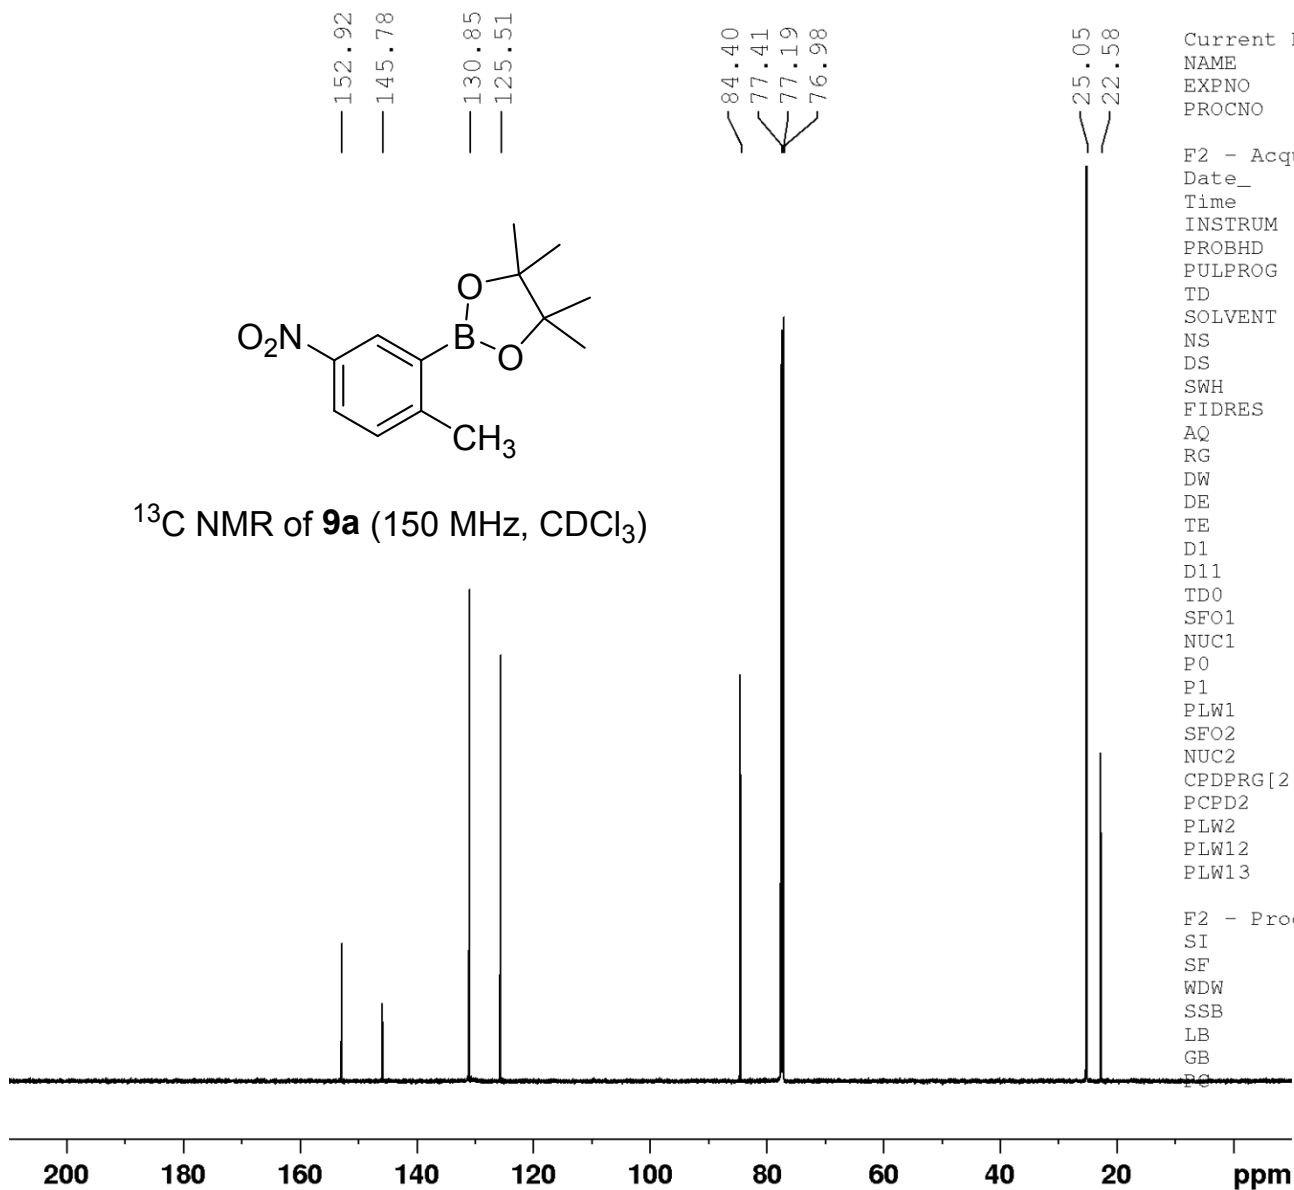

Current Data Parameters  
 NAME PVK49-X42 A-3' Pure  
 EXPNO 2  
 PROCNO 1

F2 - Acquisition Parameters  
 Date\_ 20230109  
 Time 16.17 h  
 INSTRUM spect  
 PROBHD Z148658\_0003 (  
 PULPROG zgpg30  
 TD 65536  
 SOLVENT  $\text{CDCl}_3$   
 NS 1024  
 DS 4  
 SWH 36231.883 Hz  
 FIDRES 1.105709 Hz  
 AQ 0.9043968 sec  
 RG 199.73  
 DW 13.800 usec  
 DE 6.50 usec  
 TE 298.2 K  
 D1 2.0000000 sec  
 D11 0.0300000 sec  
 TD0 1  
 SFO1 150.8864644 MHz  
 NUC1  $^{13}\text{C}$   
 P0 4.00 usec  
 P1 12.00 usec  
 PLW1 77.65699768 W  
 SFO2 600.0074000 MHz  
 NUC2  $^1\text{H}$   
 CPDPRG[2] waltz65  
 PCPD2 70.00 usec  
 PLW2 13.23200035 W  
 PLW12 0.64876997 W  
 PLW13 0.32633001 W

F2 - Processing parameters  
 SI 32768  
 SF 150.8713540 MHz  
 WDW EM  
 SSB 0  
 LB 1.00 Hz  
 GB 0  
 PC 1.40

8.133  
8.129  
8.119  
8.115  
8.090  
8.086  
8.076  
8.072  
7.472  
7.458  
7.413  
7.399

2.809  
2.526  
2.506  
2.503  
2.500  
2.497  
2.494

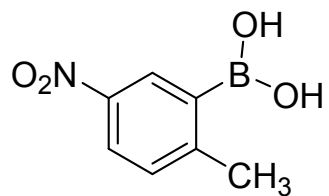

<sup>1</sup>H NMR of **9b** (600 MHz, DMSO-d<sub>6</sub>)

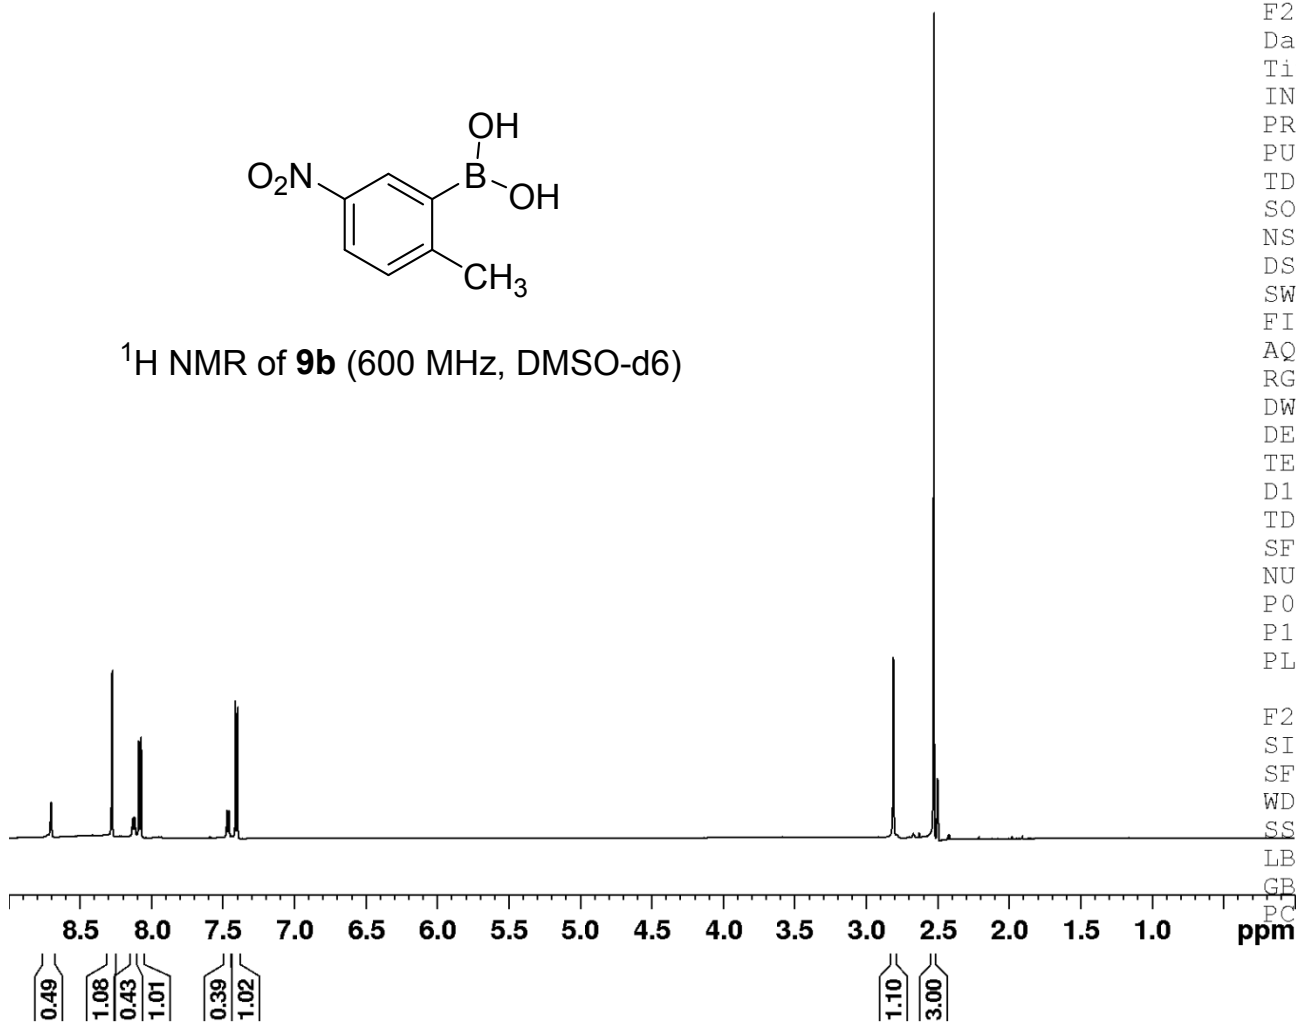

Current Data Parameters  
NAME PVK49-X65 A3 Pure  
EXPNO 1  
PROCNO 1

F2 - Acquisition Parameters  
Date\_ 20230306  
Time 13.18 h  
INSTRUM spect  
PROBHD Z855801\_0105 (  
PULPROG zg30  
TD 65536  
SOLVENT DMSO  
NS 16  
DS 2  
SWH 12019.230 Hz  
FIDRES 0.366798 Hz  
AQ 2.7262976 sec  
RG 63.39  
DW 41.600 usec  
DE 10.93 usec  
TE 295.0 K  
D1 1.00000000 sec  
TD0 1  
SFO1 599.9587047 MHz  
NUC1 1H  
P0 4.00 usec  
P1 12.00 usec  
PLW1 15.77700043 W

F2 - Processing parameters  
SI 65536  
SF 599.9550061 MHz  
WDW EM  
SSB 0  
LB 0.30 Hz  
GB 0  
PC 1.00

151.992  
150.201  
145.257  
144.973  
131.320  
130.590  
128.804  
127.666  
123.954  
123.516

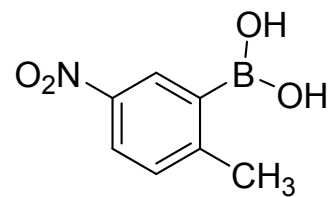

<sup>1</sup>H NMR of **9b** (600 MHz, DMSO-d<sub>6</sub>)

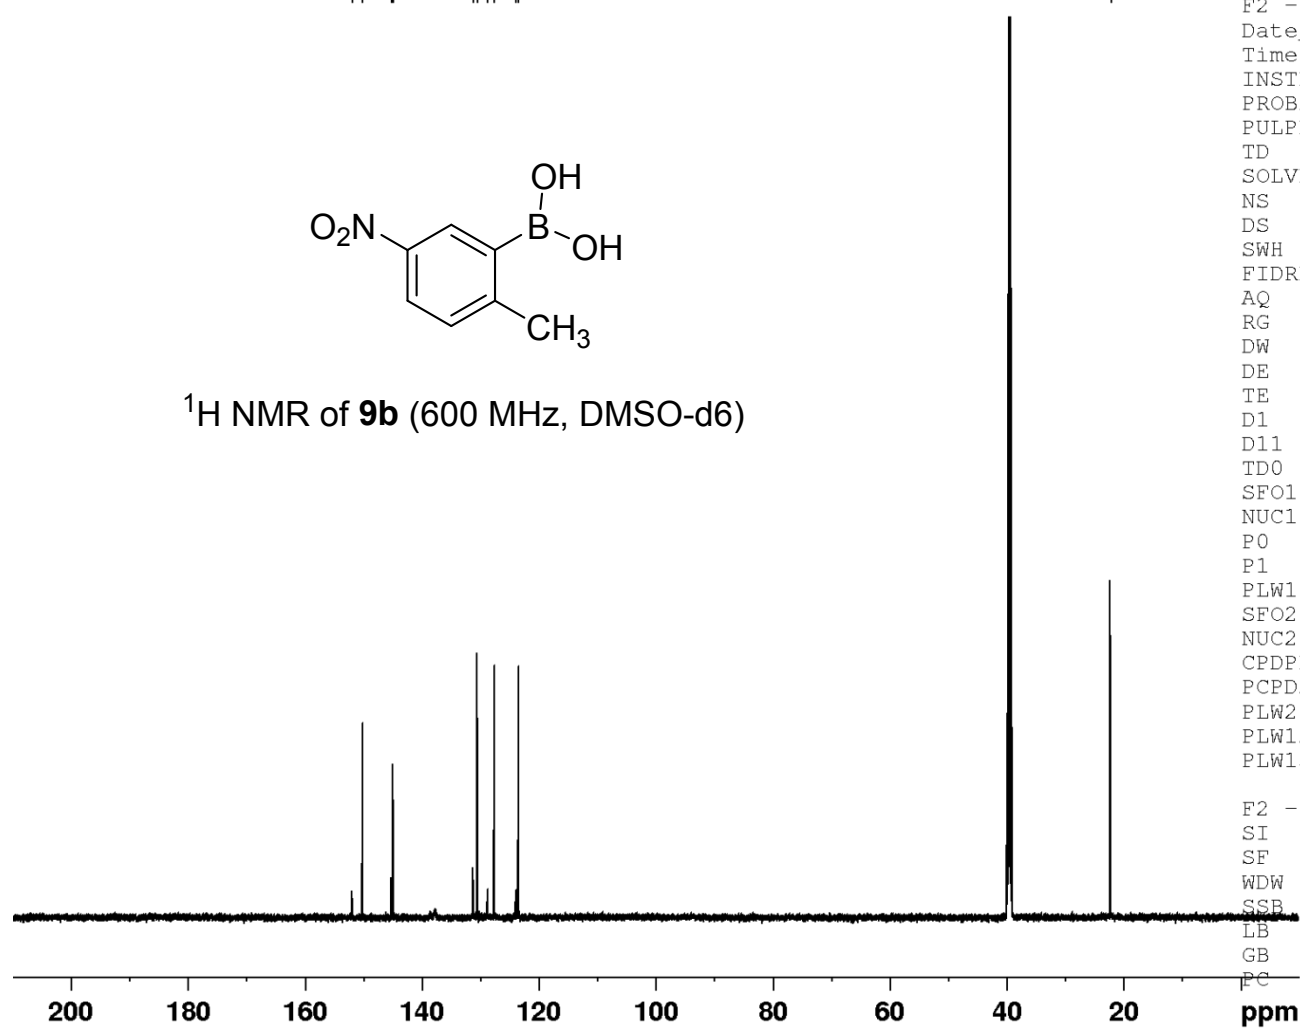

Current Data Parameters  
NAME PVK49-X65 A3 Pure  
EXPNO 2  
PROCNO 1

F2 - Acquisition Parameters  
Date\_ 20230306  
Time 14.10 h  
INSTRUM spect  
PROBHD Z855801\_0105 (  
PULPROG zgpg30  
TD 65536  
SOLVENT DMSO  
NS 1024  
DS 4  
SWH 36231.883 Hz  
FIDRES 1.105709 Hz  
AQ 0.9043968 sec  
RG 194.75  
DW 13.800 usec  
DE 6.50 usec  
TE 296.8 K  
D1 2.0000000 sec  
D11 0.0300000 sec  
TD0 1  
SFO1 150.8738906 MHz  
NUC1 13C  
P0 3.67 usec  
P1 11.00 usec  
PLW1 178.30999756 W  
SFO2 599.9573998 MHz  
NUC2 1H  
CPDPRG[2] waltz65  
PCPD2 70.00 usec  
PLW2 15.77700043 W  
PLW12 0.46366000 W  
PLW13 0.23322000 W

F2 - Processing parameters  
SI 32768  
SF 150.8588758 MHz  
WDW EM  
SSB 0  
LB 1.00 Hz  
GB 0  
PC 1.40



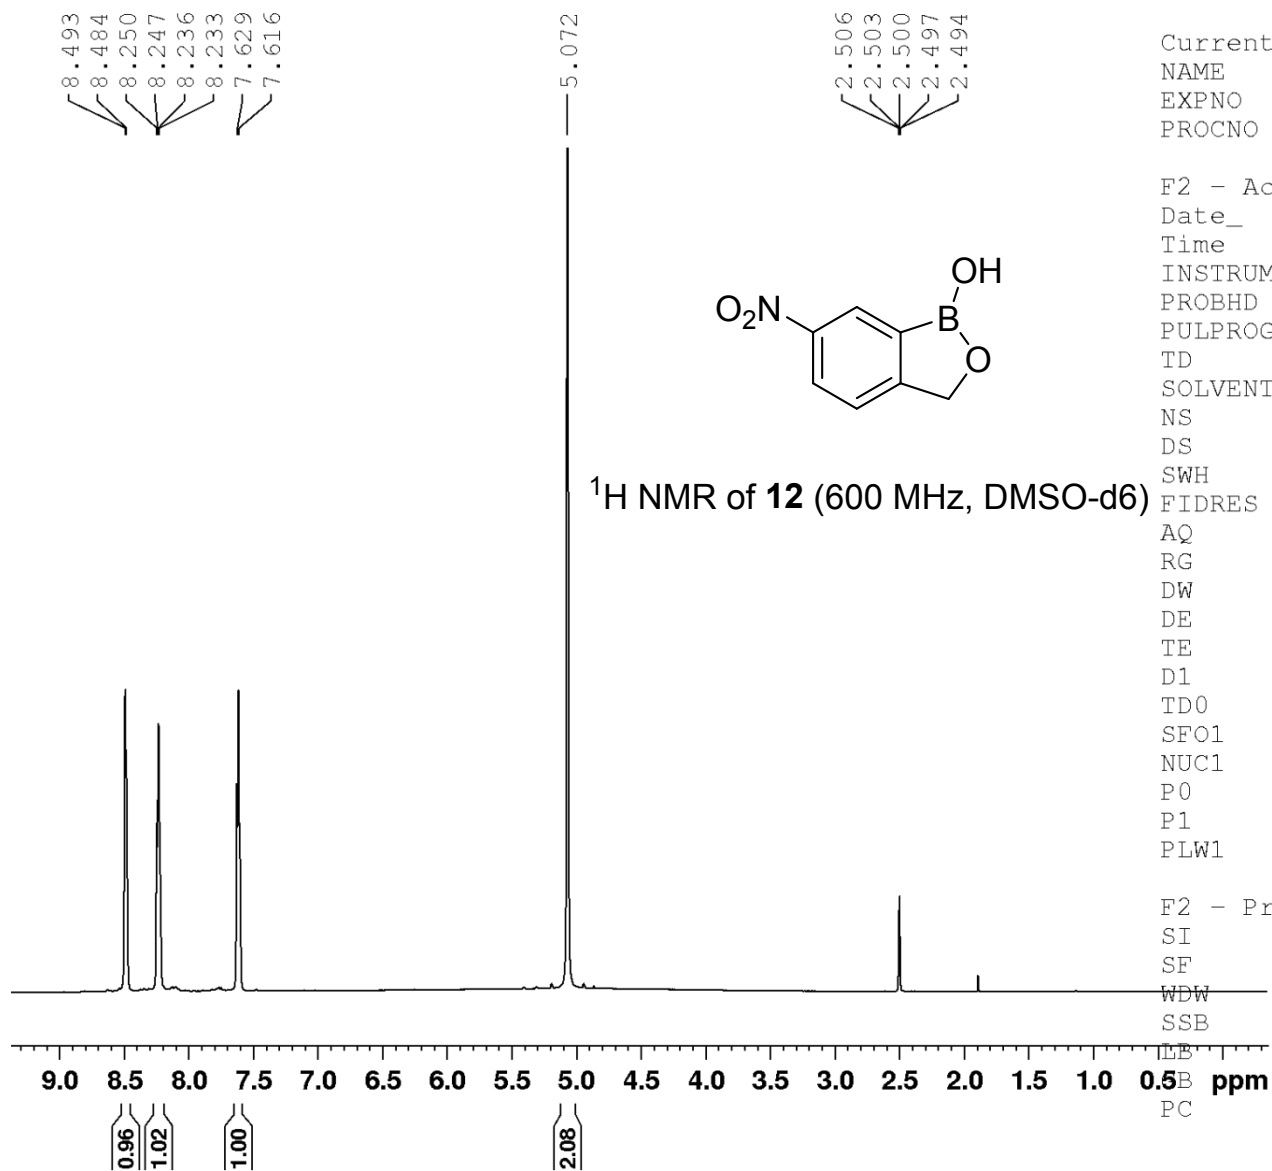

Current Data Parameters

NAME PVK49-X68 Pure A-4  
 EXPNO 1  
 PROCNO 1

F2 - Acquisition Parameters

Date\_ 20230110  
 Time 15.19 h  
 INSTRUM spect  
 PROBHD Z148658\_0003 (  
 PULPROG zg30  
 TD 65536  
 SOLVENT DMSO  
 NS 16  
 DS 2  
 SWH 12019.230 Hz  
 FIDRES 0.366798 Hz  
 AQ 2.7262976 sec  
 RG 61  
 DW 41.600 usec  
 DE 10.33 usec  
 TE 296.2 K  
 D1 1.00000000 sec  
 TD0 1  
 SFO1 600.0087050 MHz  
 NUC1 1H  
 P0 5.17 usec  
 P1 15.50 usec  
 PLW1 13.23200035 W

F2 - Processing parameters

SI 65536  
 SF 600.0050064 MHz  
 WDW EM  
 SSB 0  
 LB 0.30 Hz  
 GB 0  
 PC 1.00

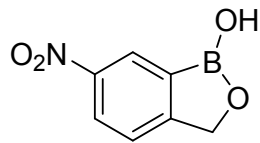

<sup>13</sup>C NMR of **12** (150 MHz, DMSO-d<sub>6</sub>)

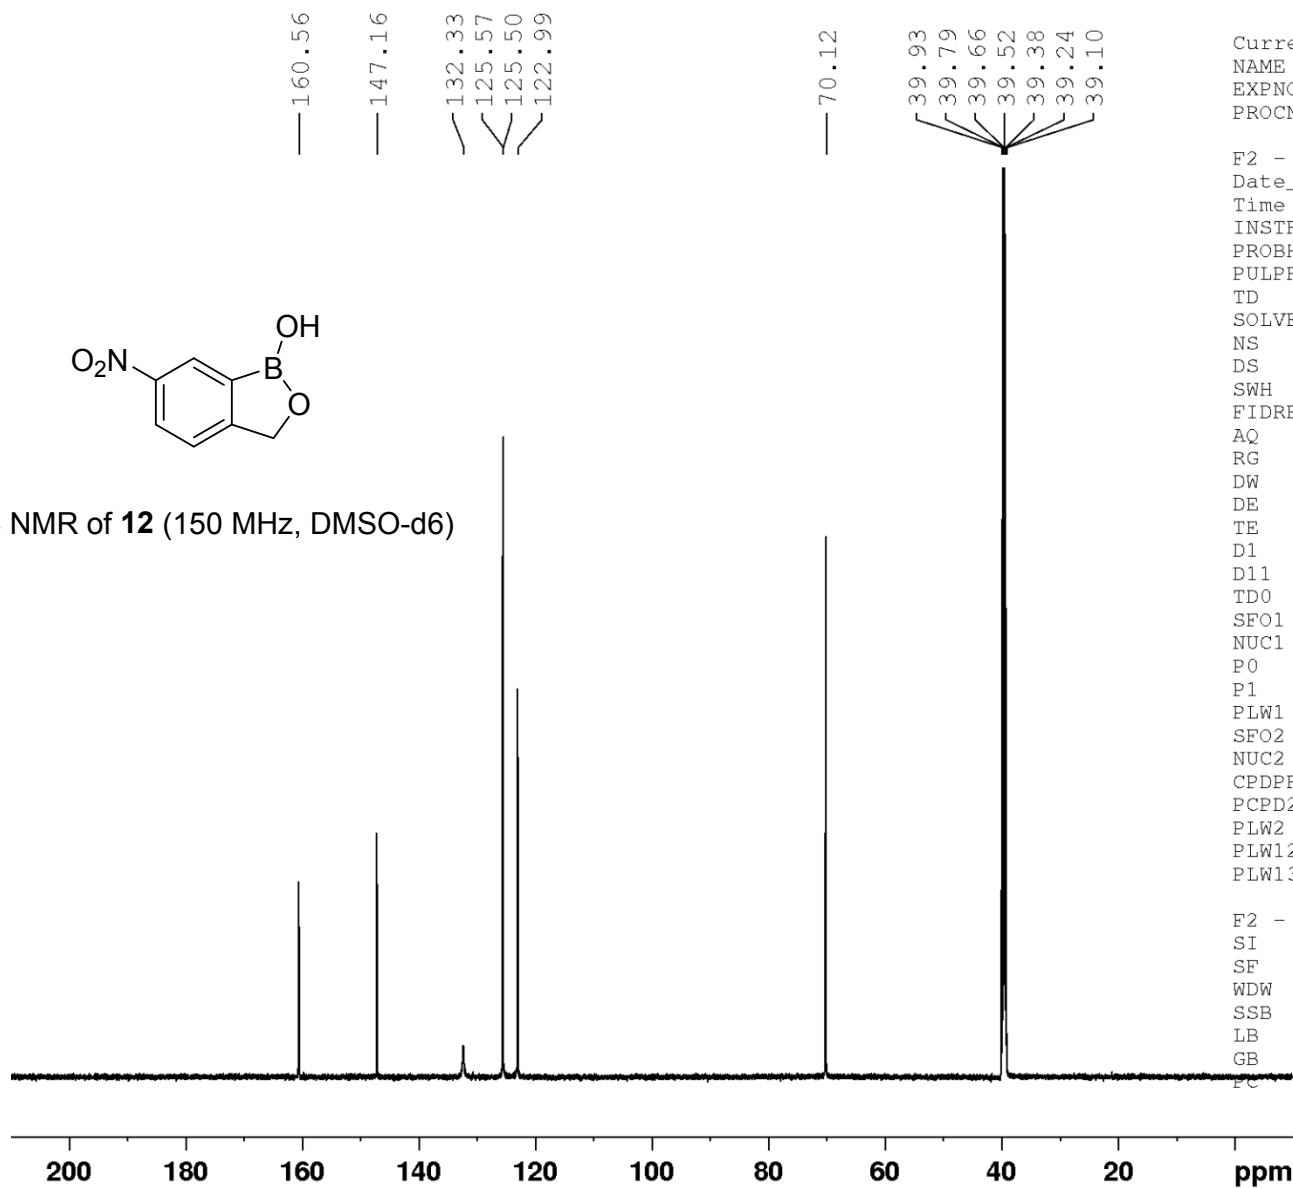

Current Data Parameters  
 NAME PVK49-X68 Pure A-4  
 EXPNO 2  
 PROCNO 1

F2 - Acquisition Parameters

Date\_ 20230110  
 Time 16.11 h  
 INSTRUM spect  
 PROBHD Z148658\_0003 (  
 PULPROG zgpg30  
 TD 65536  
 SOLVENT DMSO  
 NS 1024  
 DS 4  
 SWH 36231.883 Hz  
 FIDRES 1.105709 Hz  
 AQ 0.9043968 sec  
 RG 199.73  
 DW 13.800 usec  
 DE 6.50 usec  
 TE 298.1 K  
 D1 2.0000000 sec  
 D11 0.03000000 sec  
 TD0 1  
 SFO1 150.8864644 MHz  
 NUC1 13C  
 P0 4.00 usec  
 P1 12.00 usec  
 PLW1 77.65699768 W  
 SFO2 600.0074000 MHz  
 NUC2 1H  
 CPDPRG[2] waltz65  
 PCPD2 70.00 usec  
 PLW2 13.23200035 W  
 PLW12 0.64876997 W  
 PLW13 0.32633001 W

F2 - Processing parameters

SI 32768  
 SF 150.8714319 MHz  
 WDW EM  
 SSB 0  
 LB 1.00 Hz  
 GB 0  
 PC 1.40

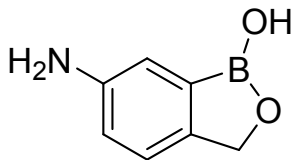

<sup>1</sup>H NMR of **6** (600 MHz, DMSO-d<sub>6</sub>)

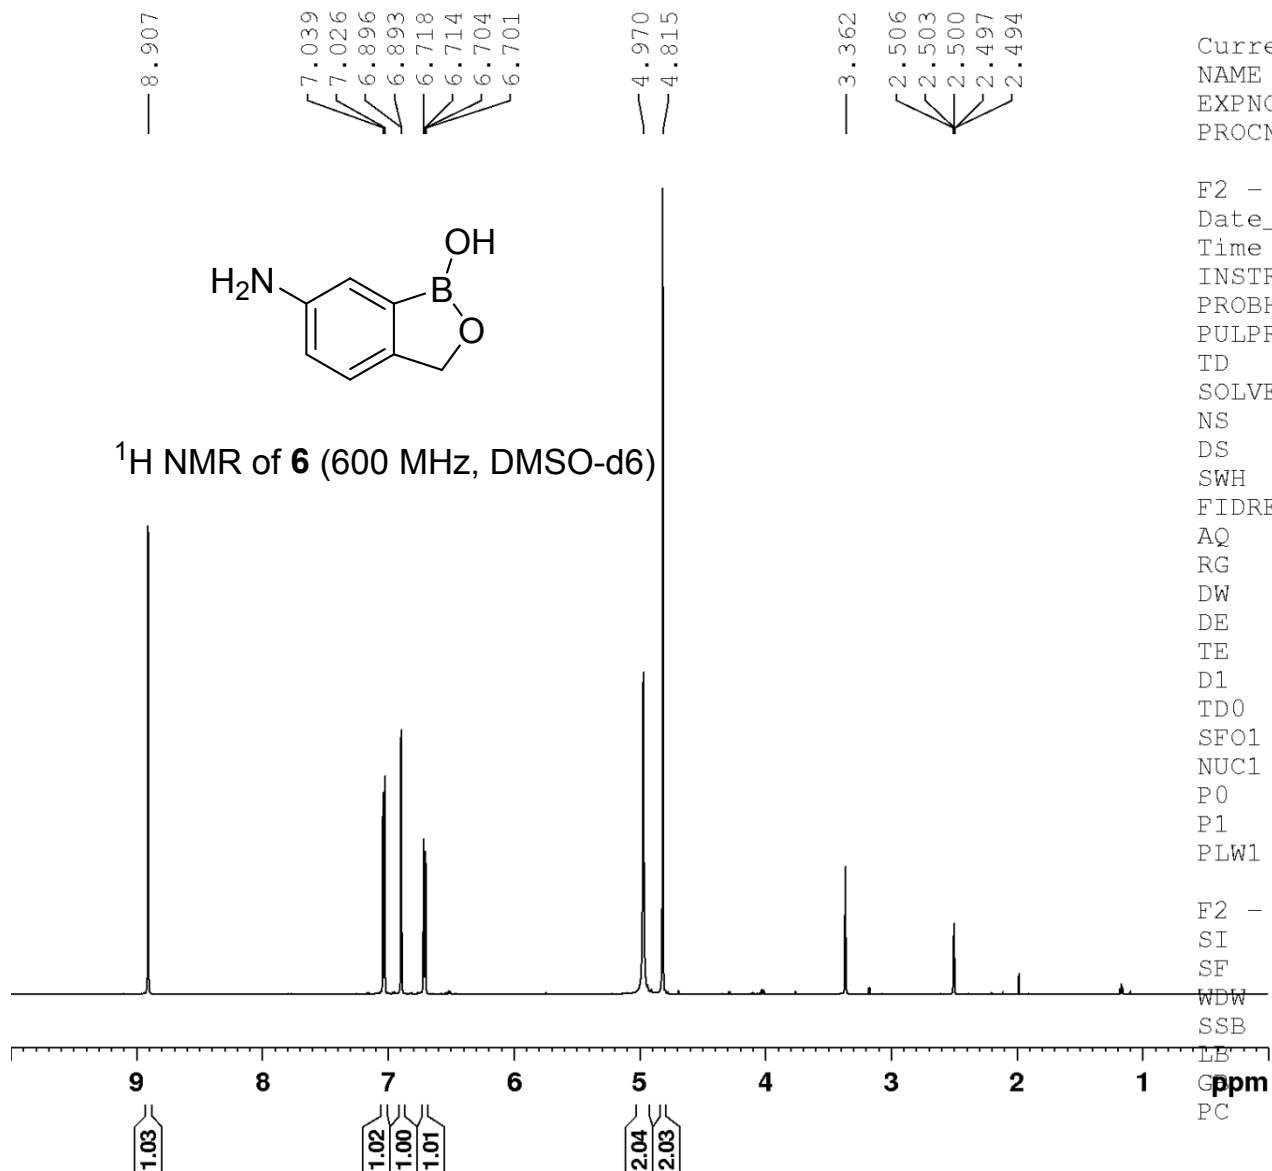

Current Data Parameters  
 NAME PVK49-X78 A-5 Pure\_2  
 EXPNO 1  
 PROCNO 1

F2 - Acquisition Parameters  
 Date\_ 20230111  
 Time 16.33 h  
 INSTRUM spect  
 PROBHD z148658\_0003 (  
 PULPROG zg30  
 TD 65536  
 SOLVENT DMSO  
 NS 16  
 DS 2  
 SWH 12019.230 Hz  
 FIDRES 0.366798 Hz  
 AQ 2.7262976 sec  
 RG 106.9  
 DW 41.600 usec  
 DE 10.33 usec  
 TE 298.0 K  
 D1 1.00000000 sec  
 TD0 1  
 SFO1 600.0087050 MHz  
 NUC1 1H  
 P0 5.17 usec  
 P1 15.50 usec  
 PLW1 13.23200035 W

F2 - Processing parameters  
 SI 65536  
 SF 600.0050063 MHz  
 WDW EM  
 SSB 0  
 LB 0.30 Hz  
 GB 0  
 PC 1.00

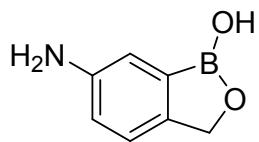

$^{13}\text{C}$  NMR of **6** (150 MHz, DMSO-d<sub>6</sub>)

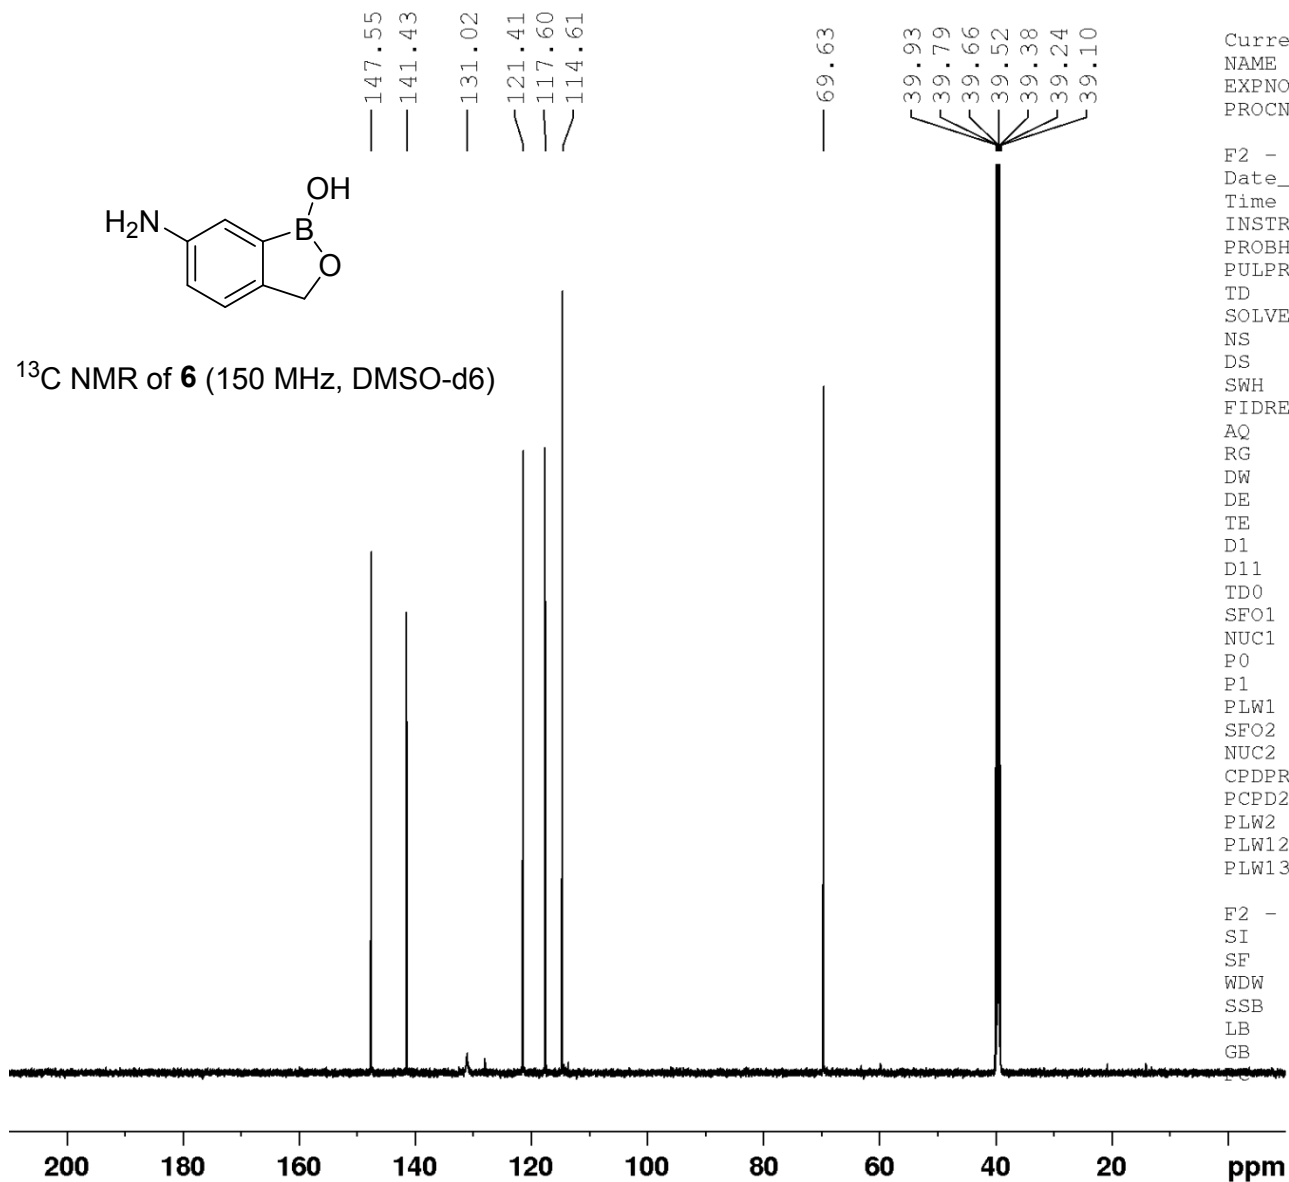

Current Data Parameters  
 NAME PVK49-X78 A-5 Pure  
 EXPNO 2  
 PROCNO 1

F2 - Acquisition Parameters  
 Date\_ 20230111  
 Time 17.25 h  
 INSTRUM spect  
 PROBHD Z148658\_0003 (  
 PULPROG zgpg30  
 TD 65536  
 SOLVENT DMSO  
 NS 1024  
 DS 4  
 SWH 36231.883 Hz  
 FIDRES 1.105709 Hz  
 AQ 0.9043968 sec  
 RG 199.73  
 DW 13.800 usec  
 DE 6.50 usec  
 TE 298.7 K  
 D1 2.00000000 sec  
 D11 0.03000000 sec  
 TD0 1  
 SFO1 150.8864644 MHz  
 NUC1 13C  
 P0 4.00 usec  
 P1 12.00 usec  
 PLW1 77.65699768 W  
 SFO2 600.0074000 MHz  
 NUC2 1H  
 CPDPRG[2] waltz65  
 PCPD2 70.00 usec  
 PLW2 13.23200035 W  
 PLW12 0.64876997 W  
 PLW13 0.32633001 W

F2 - Processing parameters  
 SI 32768  
 SF 150.8714473 MHz  
 WDW EM  
 SSB 0  
 LB 1.00 Hz  
 GB 0  
 PR 1.40

9.649  
9.646  
8.942  
8.939  
8.928  
8.924  
8.166  
8.151

4.864

3.325  
3.323  
3.320  
3.317  
3.315  
2.990

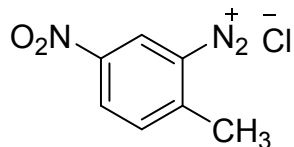

<sup>1</sup>H NMR of **14** (600 MHz, CD<sub>3</sub>OD)

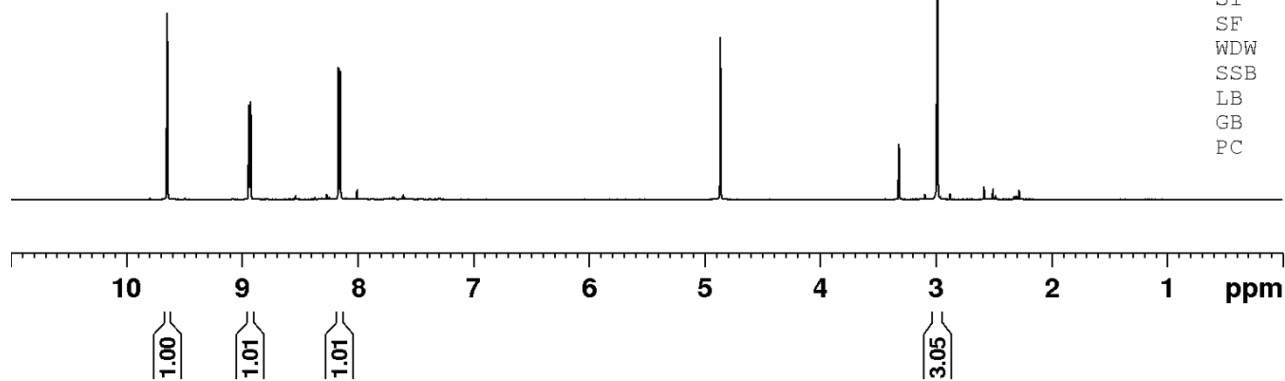

Current Data Parameters  
NAME PVK49-X61 Diazo Salt Pure  
EXPNO 1  
PROCNO 1

F2 - Acquisition Parameters  
Date\_ 20230110  
Time 17.12 h  
INSTRUM spect  
PROBHD Z148658\_0003 (  
PULPROG zg30  
TD 65536  
SOLVENT MeOD  
NS 16  
DS 2  
SWH 12019.230 Hz  
FIDRES 0.366798 Hz  
AQ 2.7262976 sec  
RG 157.38  
DW 41.600 usec  
DE 10.33 usec  
TE 296.6 K  
D1 1.00000000 sec  
TD0 1  
SFO1 600.0087050 MHz  
NUC1 1H  
P0 5.17 usec  
P1 15.50 usec  
PLW1 13.23200035 W

F2 - Processing parameters  
SI 65536  
SF 600.0050056 MHz  
WDW EM  
SSB 0  
LB 0.30 Hz  
GB 0  
PC 1.00

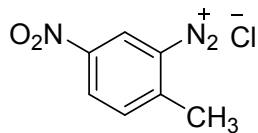

<sup>13</sup>C NMR of **14** (150 MHz, CD<sub>3</sub>OD)

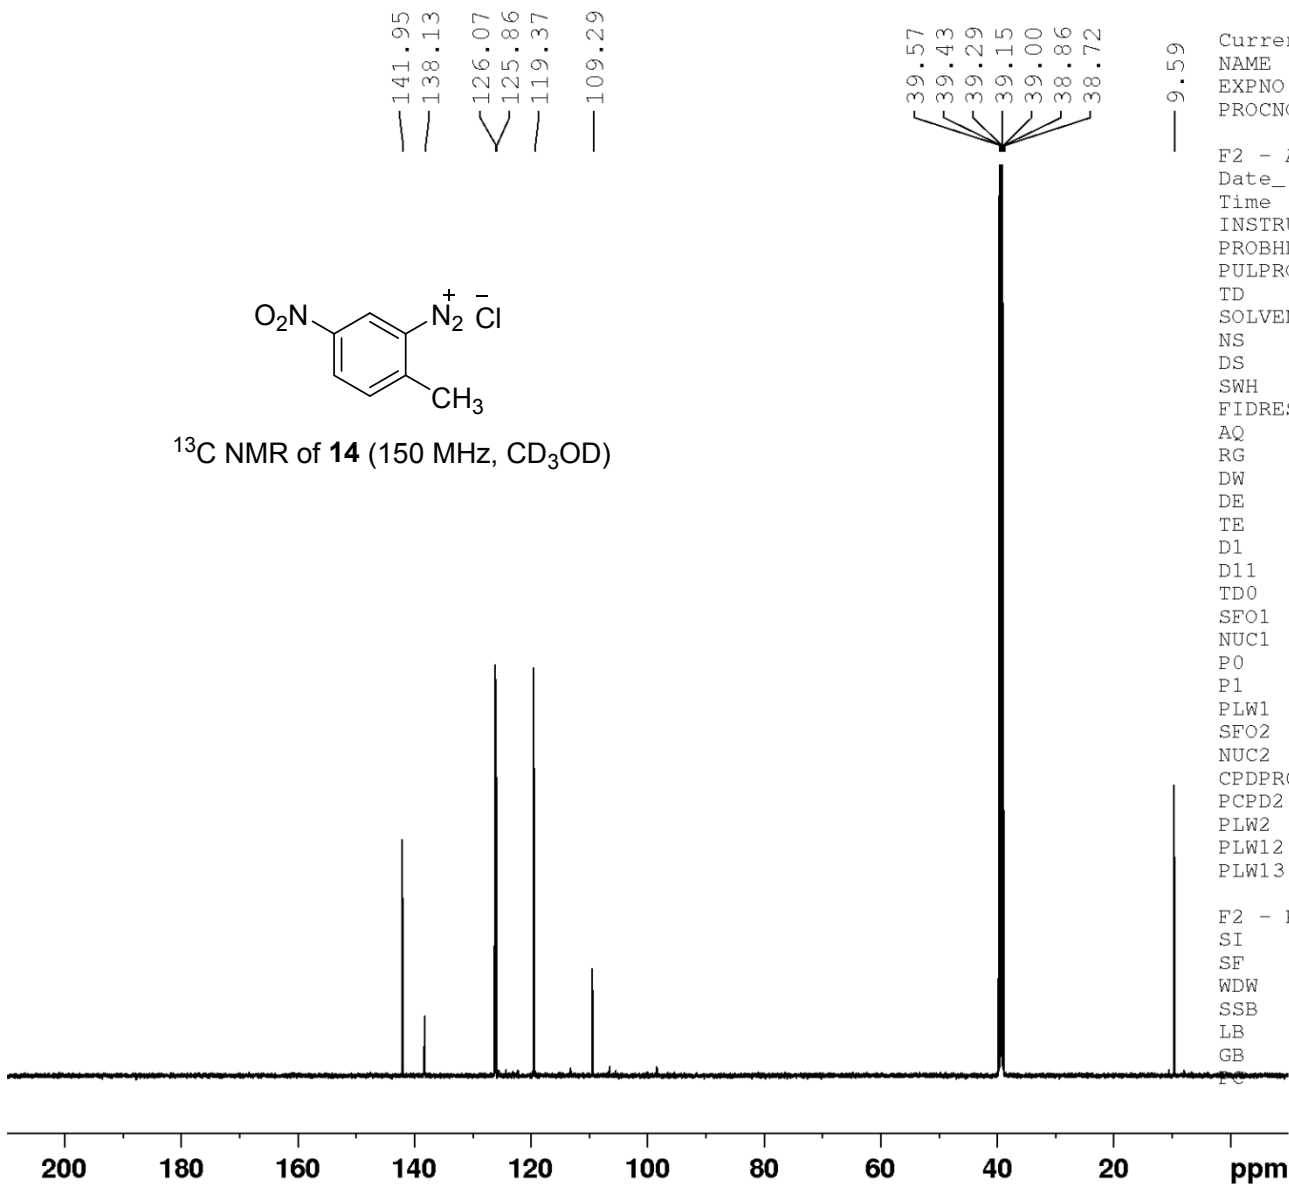

Current Data Parameters  
 NAME PVK49-X61 Diazo Salt Pure  
 EXPNO 2  
 PROCNO 1

F2 - Acquisition Parameters  
 Date\_ 20230110  
 Time 18.04 h  
 INSTRUM spect  
 PROBHD Z148658\_0003 (  
 PULPROG zgpg30  
 TD 65536  
 SOLVENT MeOD  
 NS 1024  
 DS 4  
 SWH 36231.883 Hz  
 FIDRES 1.105709 Hz  
 AQ 0.9043968 sec  
 RG 199.73  
 DW 13.800 usec  
 DE 6.50 usec  
 TE 298.0 K  
 D1 2.00000000 sec  
 D11 0.03000000 sec  
 TD0 1  
 SFO1 150.8864644 MHz  
 NUC1 13C  
 P0 4.00 usec  
 P1 12.00 usec  
 PLW1 77.65699768 W  
 SFO2 600.0074000 MHz  
 NUC2 1H  
 CPDPRG[2] waltz65  
 PCPD2 70.00 usec  
 PLW2 13.23200035 W  
 PLW12 0.64876997 W  
 PLW13 0.32633001 W

F2 - Processing parameters  
 SI 32768  
 SF 150.8726596 MHz  
 WDW EM  
 SSB 0  
 LB 1.00 Hz  
 GB 0  
 PC 1.40

8.088  
8.074  
7.304  
7.290  
7.260

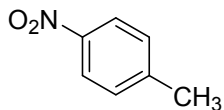

<sup>1</sup>H NMR of **SP1** (600 MHz, CDCl<sub>3</sub>)

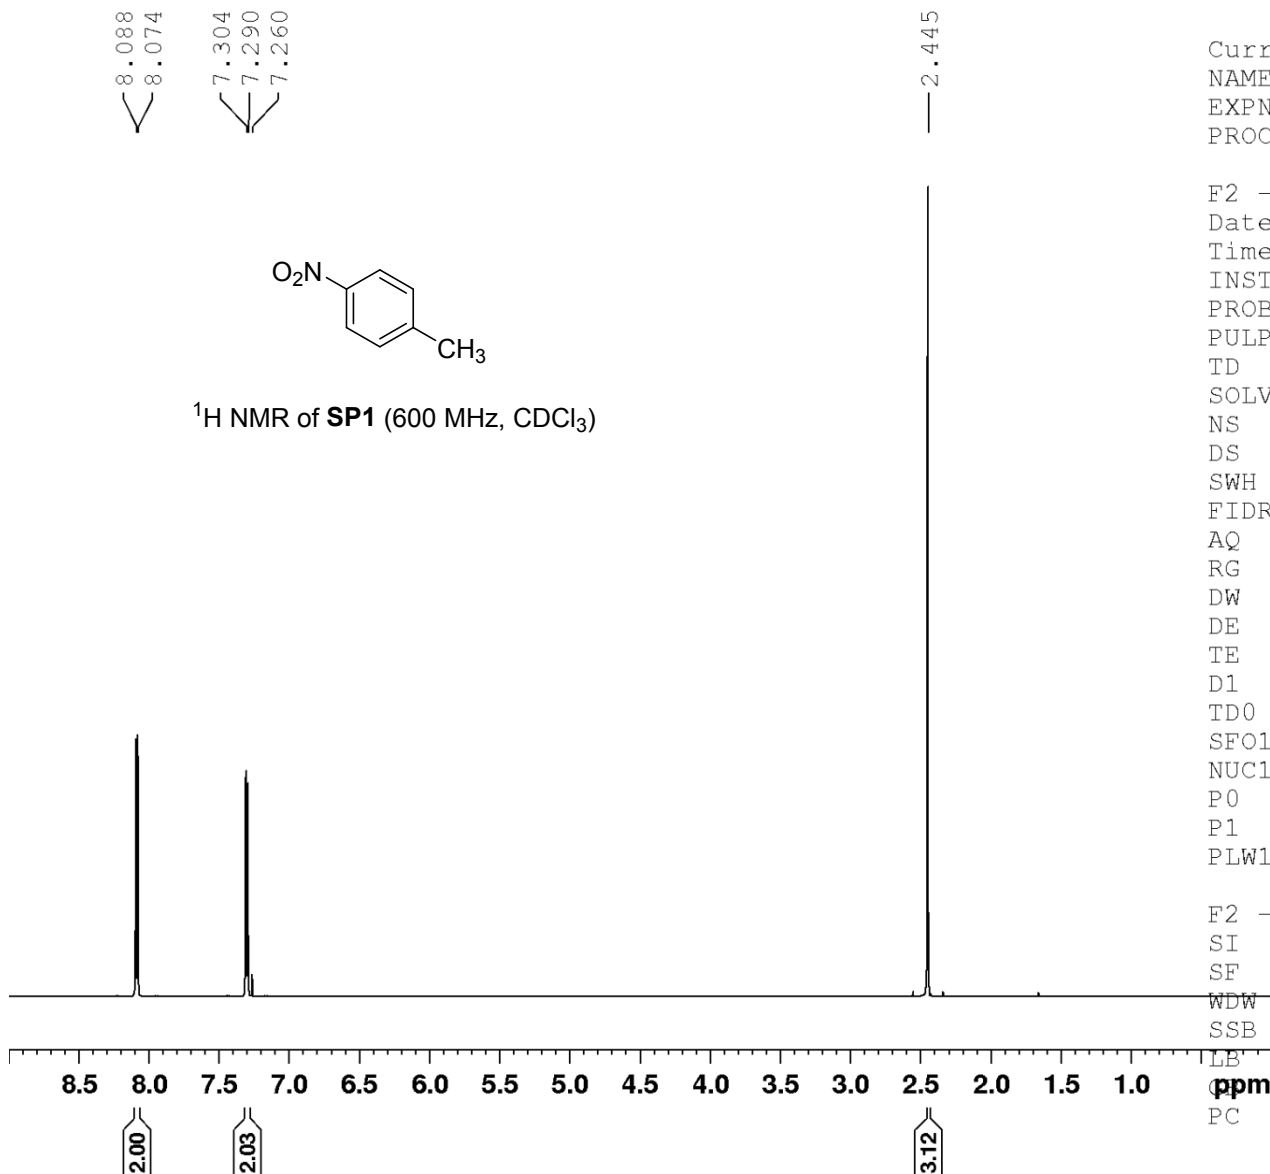

Current Data Parameters

NAME PVK49-X8 S.M Pure  
EXPNO 1  
PROCNO 1

F2 - Acquisition Parameters

Date\_ 20230106  
Time 15.42 h  
INSTRUM spect  
PROBHD Z148658\_0003 (  
PULPROG zg30  
TD 65536  
SOLVENT CDCl3  
NS 16  
DS 2  
SWH 12019.230 Hz  
FIDRES 0.366798 Hz  
AQ 2.7262976 sec  
RG 55.05  
DW 41.600 usec  
DE 10.33 usec  
TE 296.3 K  
D1 1.00000000 sec  
TD0 1  
SFO1 600.0087050 MHz  
NUC1 1H  
P0 5.17 usec  
P1 15.50 usec  
PLW1 13.23200035 W

F2 - Processing parameters

SI 65536  
SF 600.0050153 MHz  
WDW EM  
SSB 0  
LB 0.30 Hz  
PC 1.00

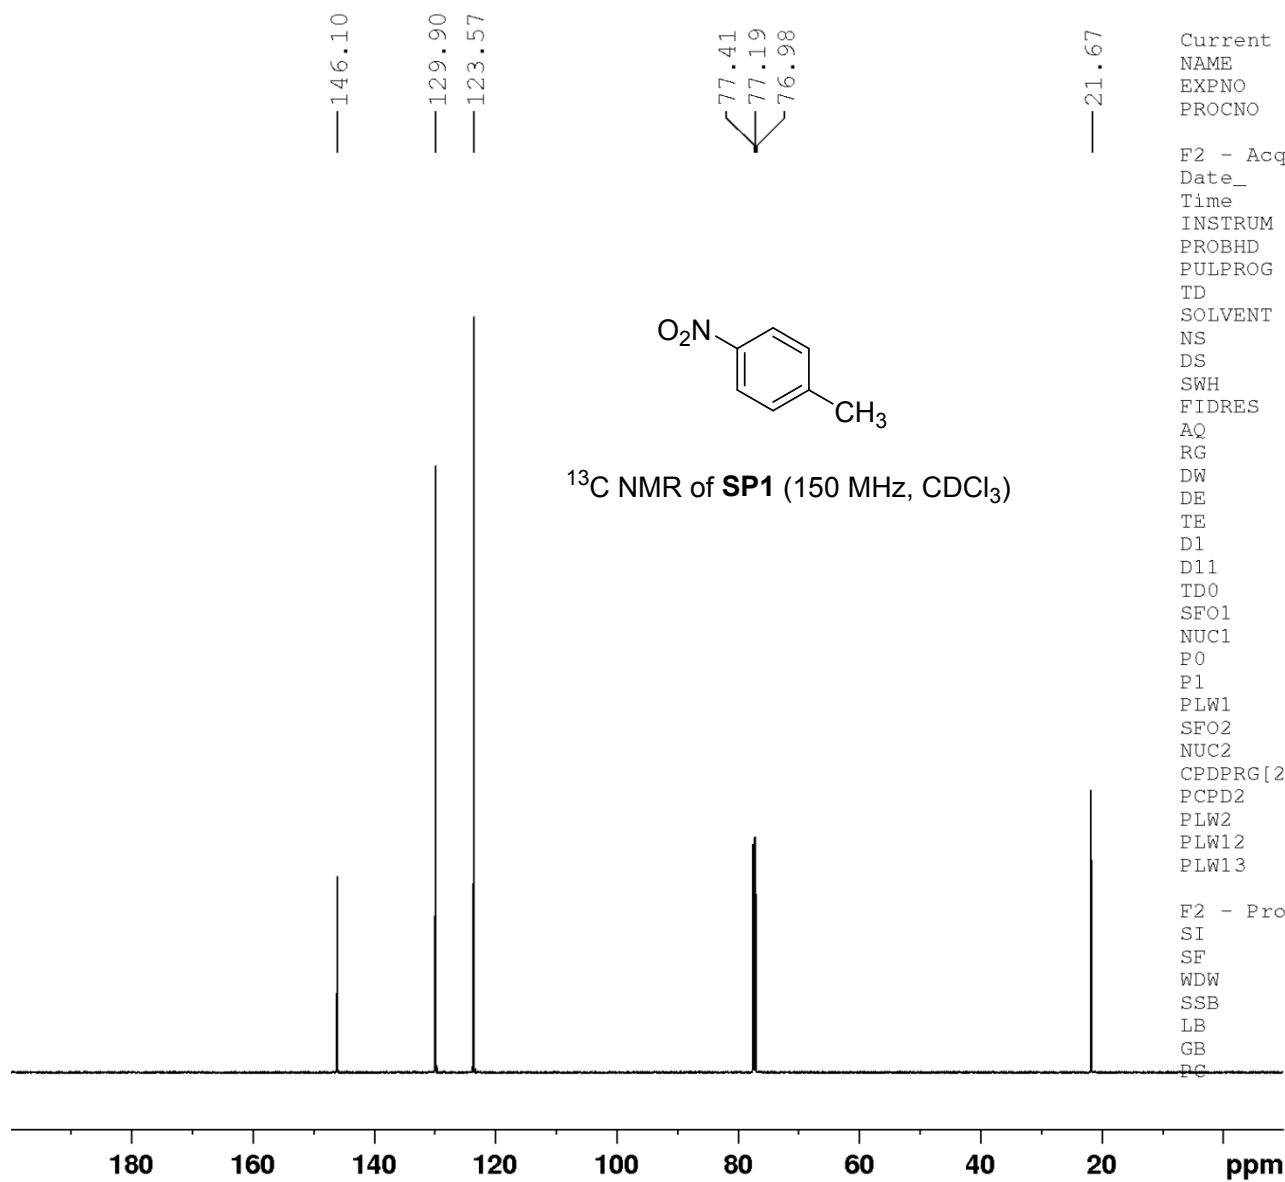

Current Data Parameters  
 NAME PVK49-X8 S.M Pure  
 EXPNO 2  
 PROCNO 1

F2 - Acquisition Parameters  
 Date\_ 20230106  
 Time 16.34 h  
 INSTRUM spect  
 PROBHD Z148658\_0003 (  
 PULPROG zgpg30  
 TD 65536  
 SOLVENT CDCl3  
 NS 1024  
 DS 4  
 SWH 36231.883 Hz  
 FIDRES 1.105709 Hz  
 AQ 0.9043968 sec  
 RG 199.73  
 DW 13.800 usec  
 DE 6.50 usec  
 TE 298.3 K  
 D1 2.00000000 sec  
 D11 0.03000000 sec  
 TD0 1  
 SFO1 150.8864644 MHz  
 NUC1 13C  
 P0 4.00 usec  
 P1 12.00 usec  
 PLW1 77.65699768 W  
 SFO2 600.0074000 MHz  
 NUC2 1H  
 CPDPRG[2] waltz65  
 PCPD2 70.00 usec  
 PLW2 13.23200035 W  
 PLW12 0.64876997 W  
 PLW13 0.32633001 W

F2 - Processing parameters  
 SI 32768  
 SF 150.8713629 MHz  
 WDW EM  
 SSB 0  
 LB 1.00 Hz  
 GB 0  
 PC 1.40
